# Supplementary material for: LOESS-based normalization workflow for targeted HDL glycoproteomics in an Alzheimer's disease cohort
Source: Royal Society of Chemistry journal article supplement (doi:10.1039/d6ra01426g), 2026-04-28
Supplement: d6ra01426g1.pdf [file d6ra01426g1.pdf]

## Supplemental Information

### **LOESS-Based Normalization Workflow for Targeted HDL Glycoproteomics in an Alzheimer's Disease Cohort**

Brian V. Hong<sup>1</sup>, Yiyun Liu<sup>2</sup>, Armin Oloumi<sup>2</sup>, Joanne K, Agus<sup>1</sup>, Yasmine Bouchibti<sup>2</sup>, Lee-Way Jin<sup>3</sup>, Izumi Maezawa<sup>3</sup>, Danielle J Harvey<sup>4</sup>, Carlito B Lebrilla<sup>2</sup>, Angela M Zivkovic<sup>1</sup>

<sup>1</sup>Department of Nutrition, University of California-Davis, Davis, CA 95616, USA

<sup>2</sup>Department of Chemistry, University of California-Davis, Davis, CA 95616, USA

<sup>3</sup>Department of Pathology and Laboratory Medicine, School of Medicine, University of California-Davis, Davis, CA 95817, USA

<sup>4</sup>Department of Public Health Sciences, University of California-Davis, Davis, CA 95616, USA

**Supplementary Table 1. Participant characteristics.** Summary of demographic and clinical variables for the 194 participants included in the HDL glycoproteomic analysis.

| Characteristics                                                              | Control        | MCI            | AD             | <i>F(df, df Error)</i>   | <i>p</i> -Value     |
|------------------------------------------------------------------------------|----------------|----------------|----------------|--------------------------|---------------------|
|                                                                              |                |                |                | or $\chi^2(df)$          |                     |
| <b><i>n</i> combined</b>                                                     | 83             | 40             | 71             | n/a                      | n/a                 |
| <i>APOE3E3</i>                                                               | 44             | 22             | 37             | n/a                      | n/a                 |
| <i>APOE3E4</i>                                                               | 39             | 18             | 34             | n/a                      | n/a                 |
| <b>Sex proportion, (male/female), combined</b>                               | 35:48:00       | 23:17          | 27:44:00       | $\chi^2(2) = 4.10$       | 0.129               |
| <i>APOE3E3</i>                                                               | 18:26          | 12:10          | 15:22          | $\chi^2(2) = 1.34$       | 0.511               |
| <i>APOE3E4</i>                                                               | 17:22          | 11:07          | 12:22          | $\chi^2(2) = 3.18$       | 0.203               |
| <b>Age, years, mean <math>\pm</math> SD, (<i>n</i>), combined</b>            | 75.5 $\pm$ 7.0 | 78.0 $\pm$ 7.0 | 78.9 $\pm$ 7.2 | <i>F</i> (2, 191) = 4.82 | 0.009 <sup>ab</sup> |
|                                                                              | 83             | 40             | 71             |                          |                     |
| <i>APOE3E3</i>                                                               | 75.9 $\pm$ 7.0 | 78.6 $\pm$ 7.7 | 79.7 $\pm$ 8.4 | <i>F</i> (2, 100) = 2.55 | 0.08                |
|                                                                              | 44             | 22             | 37             |                          |                     |
| <i>APOE3E4</i>                                                               | 75.0 $\pm$ 7.1 | 77.3 $\pm$ 6.2 | 78.1 $\pm$ 5.7 | <i>F</i> (2, 88) = 2.28  | 0.108               |
|                                                                              | 39             | 18             | 34             |                          |                     |
| <b>BMI, kg/m<sup>2</sup>, mean <math>\pm</math> SD, (<i>n</i>), combined</b> | 28.1 $\pm$ 4.6 | 27.1 $\pm$ 4.2 | 26.6 $\pm$ 4.6 | <i>F</i> (2, 181) = 2.00 | 0.138               |
|                                                                              | 81             | 39             | 64             |                          |                     |
| <i>APOE3E3</i>                                                               | 28.6 $\pm$ 4.5 | 27.8 $\pm$ 5.1 | 26.2 $\pm$ 4.7 | <i>F</i> (2, 93) = 2.49  | 0.089               |
|                                                                              | 43             | 21             | 32             |                          |                     |
| <i>APOE3E4</i>                                                               | 27.5 $\pm$ 4.6 | 26.3 $\pm$ 2.7 | 27.0 $\pm$ 4.9 | <i>F</i> (2, 85) = 0.42  | 0.658               |
|                                                                              | 38             | 18             | 32             |                          |                     |

|                                                                                            |            |          |           |                     |                       |
|--------------------------------------------------------------------------------------------|------------|----------|-----------|---------------------|-----------------------|
| <b>Ethnicity proportion,<br/>(African<br/>American/Asian/Hispanic/White),<br/>combined</b> | 18:2:19:44 | 4:1:4:31 | 7:1:11:52 | $\chi^2(6) = 10.97$ | 0.089                 |
|                                                                                            |            |          |           |                     |                       |
| <b>Diabetes at sample collection, %, (n),<br/>combined</b>                                 | 34%        | 7.90%    | 4.90%     | $\chi^2(2) = 22.94$ | <0.001 <sup>abc</sup> |
|                                                                                            | 76         | 38       | 61        |                     |                       |
| <i>APOE3E3</i>                                                                             | 39%        | 9.50%    | 0%        | $\chi^2(2) = 19.30$ | <0.001 <sup>abc</sup> |
|                                                                                            | 41         | 21       | 32        |                     |                       |
| <i>APOE3E4</i>                                                                             | 29%        | 5.90%    | 10%       | $\chi^2(2) = 5.64$  | 0.06                  |
|                                                                                            | 35         | 17       | 29        |                     |                       |
| <b>History of diabetes, %, (n), combined</b>                                               | 39%        | 10%      | 5.60%     | $\chi^2(2) = 28.50$ | <0.001 <sup>abc</sup> |
|                                                                                            | 83         | 39       | 71        |                     |                       |
| <i>APOE3E3</i>                                                                             | 39%        | 14%      | 0%        | $\chi^2(2) = 19.51$ | <0.001 <sup>abc</sup> |
|                                                                                            | 44         | 21       | 37        |                     |                       |
| <i>APOE3E4</i>                                                                             | 38%        | 5.60%    | 12%       | $\chi^2(2) = 8.52$  | 0.014 <sup>abc</sup>  |
|                                                                                            | 39         | 18       | 34        |                     |                       |
| <b>History of hypercholesterolemia, %, (n), combined</b>                                   | 74%        | 60%      | 54%       | $\chi^2(2) = 6.70$  | 0.035 <sup>ab</sup>   |
|                                                                                            | 81         | 40       | 70        |                     |                       |
| <i>APOE3E3</i>                                                                             | 62%        | 64%      | 47%       | $\chi^2(2) = 2.21$  | 0.331                 |
|                                                                                            | 42         | 22       | 36        |                     |                       |
| <i>APOE3E4</i>                                                                             | 87%        | 56%      | 62%       | $\chi^2(2) = 8.52$  | 0.014 <sup>abc</sup>  |
|                                                                                            | 39         | 18       | 34        |                     |                       |

|                                                      |     |     |     |                    |       |
|------------------------------------------------------|-----|-----|-----|--------------------|-------|
| <b>History of hypertension, %, (n),<br/>combined</b> | 72% | 65% | 76% | $\chi^2(2) = 1.56$ | 0.459 |
|                                                      | 83  | 40  | 71  |                    |       |
| <i>APOE3E3</i>                                       | 75% | 77% | 76% | $\chi^2(2) = 0.04$ | 0.98  |
|                                                      | 44  | 22  | 37  |                    |       |
| <i>APOE3E4</i>                                       | 69% | 50% | 76% | $\chi^2(2) = 3.84$ | 0.147 |
|                                                      | 39  | 18  | 34  |                    |       |

Abbreviations: AD = Alzheimer's disease dementia, BMI = body mass index, MCI = mild cognitive impairment. ANOVA were performed for continuous variables (age and BMI), and chi-squared ( $\chi^2$ ) were performed for categorical variables (sex proportion, ethnicity proportion, diabetes at sample collection, history of diabetes, history of hypercholesterolemia, and history of hypertension). If significance is reached by ANOVA or  $\chi^2$ , Tukey's or Bonferroni's post hoc comparison was carried out, respectively. <sup>a</sup>Significance across all three groups. <sup>b</sup>Significance between the control compared with AD. <sup>c</sup>Significance between the control compared with MCI.

**Supplementary Table 2. Coefficients of variation before and after normalization.** Summary of QC mean intensity, standard deviation, and pre- and post-normalization coefficients of variation (CV Pre and CV Post) for all peptide and glycopeptide features exceeding the QC intensity threshold in the pooled HDL sample-preparation QC. The pooled QC, generated from all 194 participant HDL isolates, was used to assess analytical reproducibility and to select the optimal Sigma internal-standard peptide for each feature. CV Pre reflects raw measurement variability, and CV post reflects variability after LOESS drift correction and feature-specific internal-standard normalization.

| Feature                         | Mean Intensity | SD Intensity | CV Pre (%) | CV Post (%) |
|---------------------------------|----------------|--------------|------------|-------------|
| A1AT_107_5401                   | 936543.97      | 636107.52    | 67.9       | 42.5        |
| A1AT_107_5411                   | 445945.23      | 126646.67    | 28.4       | 27.4        |
| A1AT_107_6501/6520              | 152797.93      | 78474.28     | 51.4       | 43.8        |
| A1AT_107_6503                   | 41242.52       | 12406.98     | 30.1       | 32.3        |
| A1AT_107_6513                   | 56467.15       | 22995.47     | 40.7       | 33.1        |
| A1AT_271MC_5402                 | 809341.26      | 221403.71    | 27.4       | 28.5        |
| A1AT_70_5402                    | 9206793.26     | 5913704.31   | 64.2       | 46.5        |
| A1AT_AVLTIDEK                   | 431194.24      | 371528.46    | 86.2       | 74.3        |
| APOA1_DLATVYVDVLK               | 6880019.88     | 6751924.78   | 98.1       | 84.7        |
| APOA1_LAEYHAK                   | 101797993.98   | 40088933.41  | 39.4       | 27.5        |
| APOA2_AGTELVNFLSYFVELGTQPATQ_z2 | 9385904.72     | 7770244.42   | 82.8       | 61.9        |
| APOA2_SKEQLTPLIK_z2             | 1527049.00     | 1489372.85   | 97.5       | 92.2        |
| APOA4_LAPLAEDVR_z2              | 590185.32      | 322556.43    | 54.7       | 39.0        |
| APOA4_LGEVNTYAGDLQK_z2          | 20385.34       | 24291.29     | 119.2      | 89.3        |
| APOA5_AQLLGGVDEAWALLQGLQSR_z3   | 407080.33      | 115234.44    | 28.3       | 27.8        |
| APOB_2982_5421                  | 56552.80       | 19095.44     | 33.8       | 34.7        |
| APOB_GFEPTEALFGK                | 61313.57       | 78551.32     | 128.1      | 122.7       |
| APOC1_QSELSAK                   | 185208.91      | 218737.51    | 118.1      | 81.7        |
| APOC2_TYLPVAVDEK_z2             | 15070397.38    | 10151103.22  | 67.4       | 43.1        |
| APOC3_94AMC_11000_z3            | 36410.13       | 35145.45     | 96.5       | 92.1        |
| APOC3_94A_11000_z2              | 109054.87      | 35012.28     | 32.1       | 30.2        |
| APOC3_94Aoff_1101               | 33040.23       | 13528.89     | 40.9       | 34.6        |
| APOC3_94MC_1101                 | 23108.42       | 12569.18     | 54.4       | 46.3        |
| APOC3_94MC_1102                 | 133178.97      | 97501.50     | 73.2       | 62.7        |
| APOC3_94_0300                   | 1416295.65     | 572517.51    | 40.4       | 32.6        |
| APOC3_94_0310                   | 374451.92      | 98072.71     | 26.2       | 24.2        |
| APOC3_94_1101                   | 958903.81      | 337507.67    | 35.2       | 32.0        |
| APOC3_94_1102                   | 209663.63      | 99002.02     | 47.2       | 44.5        |
| APOC3_DALSSVQESQVAQQAR          | 2881933.52     | 3055871.51   | 106.0      | 71.6        |
| APOC3_GWVTGDGFSSLK              | 1806719.18     | 1265961.77   | 70.1       | 51.3        |
| APOD_65_6610                    | 34148.58       | 32011.25     | 93.7       | 89.1        |
| APOD_VLNQELR                    | 17290155.66    | 10194224.89  | 59.0       | 55.2        |

|                              |             |            |       |       |
|------------------------------|-------------|------------|-------|-------|
| APOE3/4_LAVYQAGAR            | 3173489.00  | 3152575.74 | 99.3  | 62.0  |
| APOE_307/308_11010_z3        | 52857.52    | 54114.45   | 102.4 | 66.8  |
| APOE_AATVGLAGQPLQER_z2       | 8877758.47  | 5285755.11 | 59.5  | 37.6  |
| APOE_LGPLVEQGR               | 11565889.58 | 7487096.80 | 64.7  | 37.4  |
| APOF_273/274_11010_z3        | 98530.80    | 120561.91  | 122.4 | 94.2  |
| APOF_273/274_11020_z3        | 22798.95    | 26473.86   | 116.1 | 94.1  |
| APOF_SGVQQLIQYYQDQK_z2       | 152651.54   | 168002.82  | 110.1 | 77.2  |
| APOL1_VTEPISAESGEQVER_z2     | 503533.43   | 677499.43  | 134.5 | 81.4  |
| APOM_AFLLTPR                 | 34597743.56 | 8896514.63 | 25.7  | 27.4  |
| APOM_SLTSCCLDSK              | 5555061.99  | 2468016.50 | 44.4  | 41.2  |
| C1S_LLEVPEGR                 | 158862.30   | 181946.89  | 114.5 | 74.3  |
| CLUS_374_5420/5401           | 34791.92    | 34644.17   | 99.6  | 88.7  |
| CLUS_ASSIIDELFQDR            | 58649.40    | 82672.46   | 141.0 | 101.6 |
| FETUA_176_6501               | 34924.36    | 33197.39   | 95.1  | 88.8  |
| FETUA_AHYDLR                 | 124398.68   | 83943.16   | 67.5  | 39.7  |
| LCAT_LEPGQQEEYYR_z2          | 34925.43    | 38463.38   | 110.1 | 106.1 |
| LCAT_SGLVSNAPGVQIR_z2        | 30944.12    | 37595.27   | 121.5 | 112.4 |
| PLTP_245_5412                | 450420.05   | 161363.88  | 35.8  | 35.7  |
| PLTP_GAFFPLTER_z2            | 222318.57   | 231741.42  | 104.2 | 65.0  |
| PON1_253_43010_z3            | 61232.13    | 42310.35   | 69.1  | 65.0  |
| PON3_29_76210_z3             | 35448.39    | 32257.73   | 91.0  | 84.7  |
| SAA1_FFGHGAEDSLADQAANEWGR_z3 | 92799.44    | 154625.71  | 166.6 | 89.6  |
| SAA2_GPGGAWAAEVISNAR_z3      | 28581.88    | 34207.97   | 119.7 | 115.2 |
| SAA4_94_5401_z4              | 615936.51   | 271964.14  | 44.2  | 35.8  |
| SAA4_94_5420_z4              | 627466.16   | 297024.22  | 47.3  | 34.5  |
| SAA4_94_6522                 | 153721.53   | 49618.63   | 32.3  | 26.7  |
| SAA4_FRPDGLPK_z2             | 120591.26   | 120565.86  | 100.0 | 75.0  |

**Supplementary Table 3. Pooled HDL QC performance for the 21 analytes included in downstream statistical modeling.** For each feature, the table reports mean intensity, standard deviation, and pre- and post-normalization coefficients of variation (CV) in the pooled HDL QC samples.

| <b>Feature</b>                | <b>Mean Intensity</b> | <b>SD Intensity</b> | <b>CV Pre (%)</b> | <b>CV Post (%)</b> |
|-------------------------------|-----------------------|---------------------|-------------------|--------------------|
| A1AT_107_5411                 | 445945.23             | 126646.67           | 28.4              | 27.4               |
| A1AT_271MC_5402               | 809341.26             | 221403.71           | 27.4              | 28.5               |
| A1AT_70_5402                  | 9206793.26            | 5913704.31          | 64.2              | 46.5               |
| APOA1_LAEYHAK                 | 101797993.98          | 40088933.41         | 39.4              | 27.5               |
| APOA4_LAPLAEDVR_z2            | 590185.32             | 322556.43           | 54.7              | 39.0               |
| APOA5_AQLLGGVDEAWALLQGLQSR_z3 | 407080.33             | 115234.44           | 28.3              | 27.8               |
| APOC2_TYLPVAVDEK_z2           | 15070397.38           | 10151103.22         | 67.4              | 43.1               |
| APOC3_94A_11000_z2            | 109054.87             | 35012.28            | 32.1              | 30.2               |
| APOC3_94_0300                 | 1416295.65            | 572517.51           | 40.4              | 32.6               |
| APOC3_94_0310                 | 374451.92             | 98072.71            | 26.2              | 24.2               |
| APOC3_94_1101                 | 958903.81             | 337507.67           | 35.2              | 32.0               |
| APOC3_94_1102                 | 209663.63             | 99002.02            | 47.2              | 44.5               |
| APOC3_GWVTDGFSSLK             | 1806719.18            | 1265961.77          | 70.1              | 51.3               |
| APOD_VLNQELR                  | 17290155.66           | 10194224.89         | 59.0              | 55.2               |
| APOE_AATVGSAGQPLQER_z2        | 8877758.47            | 5285755.11          | 59.5              | 37.6               |
| APOE_LGPLVEQGR                | 11565889.58           | 7487096.80          | 64.7              | 37.4               |
| APOM_AFLTPR                   | 34597743.56           | 8896514.63          | 25.7              | 27.4               |
| APOM_SLTSCCLDSK               | 5555061.99            | 2468016.50          | 44.4              | 41.2               |
| FETUA_AHYDLR                  | 124398.68             | 83943.16            | 67.5              | 39.7               |
| PLTP_245_5412                 | 450420.05             | 161363.88           | 35.8              | 35.7               |
| SAA4_94_5420_z4               | 627466.16             | 297024.22           | 47.3              | 34.5               |

**Supplementary Table 4. Internal standard assignment for each peptide and glycopeptide feature.** Sigma peptides serving as internal standards selected for normalization of each HDL-associated peptide or glycopeptide. Selection was performed using pooled HDL QC injections by identifying, for each feature, the Sigma peptide that minimized post-normalization coefficient of variation (CV). Only features passing the QC intensity threshold (mean QC intensity > 20,000) and detected in the participant dataset were included. The table reports the feature name and assigned internal standard.

| <b>Sigma</b> | <b>Feature</b>                |
|--------------|-------------------------------|
| sigma_1      | CLUS_291_5421/5402            |
| sigma_3      | APOA1_LAEYHAK                 |
| sigma_3      | FETUA_AHYDLR                  |
| sigma_4      | APOD_VLNQELR                  |
| sigma_5      | APOM_SLTSCCLDSK               |
| sigma_6      | APOE_LGPLVEQGR                |
| sigma_7      | APOA4_LAPLAEDVR_z2            |
| sigma_7      | APOC2_TYLPVDEK_z2             |
| sigma_8      | APOE_AATVGLAGQPLQER_z2        |
| sigma_9      | APOM_AFLLTPR                  |
| sigma_10     | APOC3_GWVTDGFSSLK             |
| sigma_12     | APOC3_94_0310                 |
| sigma_12     | APOC3_94_0300                 |
| sigma_12     | APOC3_94A_11000_z2            |
| sigma_12     | APOC3_94_1102                 |
| sigma_13     | A1AT_107_5411                 |
| sigma_13     | A1AT_271MC_5402               |
| sigma_13     | SAA4_94_5420_z4               |
| sigma_13     | A1AT_70_5402                  |
| sigma_13     | APOA5_AQLLGGVDEAWALLQGLQSR_z3 |
| sigma_13     | PLTP_245_5412                 |

**Supplementary Table 5. APOE genotype-associated differences in HDL glycopeptide and peptide features.** Unadjusted Wilcoxon rank-sum p values, Benjamini-Hochberg FDR-adjusted q values, and covariate-adjusted p values from linear models including age, ethnicity, and clinical status. Direction reflects the median abundance in APOE3/E4 compared with APOE3/E3 carriers. Six peptides showed nominal genotype-associated differences; five remained significant after FDR correction ( $q < 0.05$ ), and all six remained significant after covariate adjustment.

| Feature                | p<br>(Unadjusted)     | q (FDR) | p<br>(Covariate-<br>Adjusted) | Direction (E4 vs E3) |
|------------------------|-----------------------|---------|-------------------------------|----------------------|
| A1AT_271MC_5402        | 0.021                 | 0.075   | 0.019                         | Lower in E3/E4       |
| APOD_VLNQELR           | 0.011                 | 0.046   | 0.011                         | Lower in E3/E4       |
| APOE_AATVGLAGQPLQER_z2 | $2.57 \times 10^{-4}$ | 0.003   | $2.81 \times 10^{-4}$         | Lower in E3/E4       |
| APOE_LGPLVEQGR         | $4.93 \times 10^{-5}$ | 0.0010  | $5.33 \times 10^{-5}$         | Lower in E3/E4       |
| APOM_AFLLTPR           | 0.011                 | 0.046   | 0.010                         | Lower in E3/E4       |
| APOM_SLTSCCLDSK        | 0.002                 | 0.013   | 0.002                         | Lower in E3/E4       |

**Supplementary Table 6. Summary of MRM LC-MS acquisition and run-design parameters used in the current study.**

| Category                            | Parameter                                   | Value                                                                                                                                               |
|-------------------------------------|---------------------------------------------|-----------------------------------------------------------------------------------------------------------------------------------------------------|
| Sample preparation before injection | Post-digest handling before LC-MRM          | Proteolysis was quenched by acidification with formic acid prior to LC-MRM analysis.                                                                |
| LC system                           | Liquid chromatography platform              | Agilent 1290 Infinity LC system                                                                                                                     |
| MS system                           | Mass spectrometer                           | Agilent 6490 triple quadrupole mass spectrometer (Agilent Technologies)                                                                             |
| Acquisition mode                    | Targeted MS mode                            | Multiple reaction monitoring (MRM)                                                                                                                  |
| Analytical column                   | LC column                                   | Agilent Eclipse Plus C18, RRHD 1.8 $\mu\text{m}$ , 2.1 $\times$ 100 mm                                                                              |
| Guard column                        | Precolumn                                   | Agilent Eclipse Plus C18 precolumn, RRHD 1.8 $\mu\text{m}$ , 2.1 $\times$ 5 mm                                                                      |
| Injection volume                    | Sample injected per run                     | 1.0 $\mu\text{L}$                                                                                                                                   |
| Run time                            | LC gradient duration                        | 25 min binary gradient                                                                                                                              |
| Mobile phase A                      | Solvent A                                   | 3% acetonitrile, 0.1% formic acid in nanopure water (v/v)                                                                                           |
| Mobile phase B                      | Solvent B                                   | 90% acetonitrile, 0.1% formic acid in nanopure water (v/v)                                                                                          |
| Flow rate                           | LC flow rate                                | 0.5 mL/min                                                                                                                                          |
| Transition design                   | Transition requirements                     | Monitored transitions required predetermined LC retention time and collision-induced dissociation behavior from prior glycopeptide characterization |
| Peak integration software           | Data system                                 | Agilent MassHunter Quantitative Analysis B.5.0                                                                                                      |
| Targeted panel size                 | Total targeted transitions in current study | 164                                                                                                                                                 |
| Internal standards                  | Synthetic peptide internal standards        | 12 Sigma peptides                                                                                                                                   |
| Study sample run design             | Participant samples analyzed                | 194 participant HDL samples                                                                                                                         |
| Plate structure                     | Sample layout                               | 3 $\times$ 96-well plates                                                                                                                           |
| Acquisition window                  | Total analytical sequence                   | 20 days (20 September to 9 October 2023)                                                                                                            |
| Instrument QC                       | Daily system-stability injection            | Commercial human HDL preparation injected at the start of each acquisition day                                                                      |

|                              |                         |                                                                                         |
|------------------------------|-------------------------|-----------------------------------------------------------------------------------------|
| Pooled sample-preparation QC | QC material             | QC generated by pooling equal-volume aliquots of HDL from all 194 study participants    |
| QC frequency                 | QC injection schedule   | Injected at the beginning of each plate-row block, approximately every 10 study samples |
| Total pooled QC injections   | Number of QC injections | 20                                                                                      |
