# Supplementary material for: LOESS-based normalization workflow for targeted HDL glycoproteomics in an Alzheimer's disease cohort
Source: Royal Society of Chemistry journal article supplement (doi:10.1039/d6ra01426g), 2026-04-28
Supplement: d6ra01426g2.xlsx [file d6ra01426g2.xlsx]

## Sheet: Sheet1
Sample							CLUS_291_54020_z3 Results	sigma_1 Results	CLUS_291_5421/5402 Results	APOB_3224_54020_z3 Results	CLUS_291_5420/5401 Results	CLUS_291_5400 Results	APOC1_QSELSAK Results	APOA1_LAEYHAK Results	sigma_3 Results	LCAT_108_65030_z3 Results	CLUS_291_6503 Results	CLUS_86_6503 Results	APOF_269_11010_z2 Results	FETUA_AHYDLR Results	PLTP_GAFFPLTER_z2 Results	sigma_4 Results	APOD_VLNQELR Results	APOE3/4_LAVYQAGAR Results	APOF_273/274_11010_z3 Results	SAA4_FRPDGLPK_z2 Results	APOF_273/274_11020_z3 Results	APOM_SLTSCLDSK Results	APOE_307/308_11010_z2 Results	LCAT_LEPGQQEEYYR_z2 Results	sigma_5 Results	APOB_3411_5420 Results	APOE_307/308_11010_z3 Results	APOL1_VTEPISAESGEQVER_z2 Results	APOB_3411_5301 Results	APOB_3411_5320 Results	sigma_6 Results	A1AT_AVLTIDEK Results	APOE_LGPLVEQGR Results	APOE23_LGADMEDVCGR Results	APOB_3411_5401 Results	APOA4_LAPLAEDVR_z2 Results	C1S_LLEVPEGR Results	APOA2_SKEQLTPLIK_z2 Results	APOC2_TYLPAVDEK_z2 Results	APOC3_DALSSVQESQVAQQAR Results	sigma_7 Results	CLUS_354_5641 Results	APOA4_LGEVNTYAGDLQK_z2 Results
		Name	Data File	Type	Level	Acq. Date-Time	Resp.	Resp.	Resp.	Resp.	Resp.	Resp.	Resp.	Resp.	Resp.	Resp.	Resp.	Resp.	Resp.	Resp.	Resp.	Resp.	Resp.	Resp.	Resp.	Resp.	Resp.	Resp.	Resp.	Resp.	Resp.	Resp.	Resp.	Resp.	Resp.	Resp.	Resp.	Resp.	Resp.	Resp.	Resp.	Resp.	Resp.	Resp.	Resp.	Resp.	Resp.	Resp.	Resp.
		Sample2	P1C1.d	Sample		2023-09-20 18:33:36	1668.89	147039	4975.16	551.611	0	0	342590	9.28459e+07	224982	272.063	0	0	6639.78	101302	218819	3.84584e+06	1.49074e+07	2.07984e+06	62784.8	112741	21029.9	4.46912e+06	0	29080.6	913371	1849.21	29770.5	337256	0	0	1.61738e+06	305340	8.80069e+06	0.258502	0	399935	79605.7	1.92924e+06	1.55422e+07	2.44982e+06	1.04795e+07	51.03	17180.3
		Sample14	P1D1.d	Sample		2023-09-22 19:11:08	3003.2	174102	12846	8973.28	1282.23	0	356017	1.26761e+08	305582	0	1022.33	0	7173.18	123323	269634	4.64609e+06	3.59565e+07	3.45296e+06	170636	343305	80178.7	9.88532e+06	7031	124429	1.16563e+06	5554.49	61445.4	751559	0	0	2.11132e+06	929906	1.33213e+07	0	0	529582	218148	5.5536e+06	1.88617e+07	4.72521e+06	1.37847e+07	9823.66	48619.6
		Sample26	P1E1.d	Sample		2023-09-23 10:49:42	5453.63	145218	7295.58	4134.05	2016.65	299.274	159583	1.37568e+08	269885	0	590.605	0	7912.98	137949	263817	4.77955e+06	3.38898e+07	4.23979e+06	143282	114391	34055.3	9.08064e+06	5712	71224.7	1.11307e+06	6517.04	85418.1	858772	0	0	2.23487e+06	624765	1.37207e+07	2299.28	0	803543	217302	2.85055e+06	1.75777e+07	5.05469e+06	1.28118e+07	1076.17	41462.1
		Sample38	P1F1.d	Sample		2023-09-24 02:28:20	2813.47	131683	11124.4	3267.24	1464.2	0	157857	1.16807e+08	254743	0	0	0	7908.7	91207.3	189736	4.15946e+06	2.59304e+07	2.98304e+06	132544	227969	41346.3	7.09477e+06	0	69304.2	1.00383e+06	0	47287.3	482761	1691.87	1691.87	1.94173e+06	595248	1.01805e+07	0	0	585967	135207	3.19934e+06	1.1979e+07	3.08435e+06	1.21583e+07	2.21904	21571.7
		Sample14	P1B1.d	Sample		2023-09-25 18:59:53	3197.59	145652	4522.76	3989.3	2416.14	0	86426.6	1.17964e+08	214811	0	0	0	4523.76	96679.3	160597	4.11601e+06	3.05059e+07	3.59016e+06	143931	133389	30549.6	8.49734e+06	575.369	57679.6	848084	0	65355.5	470187	0	0	1.88169e+06	797294	9.95472e+06	0	0	405963	162921	2.46652e+06	1.37577e+07	3.34139e+06	1.12691e+07	0	18401.3
		Sample26	P1G1.d	Sample		2023-09-26 10:38:29	0	110742	13465.2	831.333	363.185	517.668	107798	1.27197e+08	247656	0	1143.89	44.6043	3630.73	128044	171558	4.13882e+06	2.12317e+07	2.63629e+06	61567.4	106059	20587.5	6.65047e+06	0	28509.6	1.23465e+06	5020.73	26625	365575	0	0	2.14125e+06	302544	1.16876e+07	0	0	840589	134296	1.53338e+06	1.38535e+07	2.42721e+06	1.15604e+07	861.386	8935.59
		Sample38	P1H1.d	Sample		2023-09-27 02:17:04	0	160765	9187.84	9.54981	0	0	90352	8.49768e+07	278916	0	1188.73	0	0	98505.4	169603	5.35614e+06	1.05897e+07	1.7485e+06	16711.5	65874	3348.74	4.43602e+06	2048.76	10819.2	1.17472e+06	1878.9	41798.7	274163	0	0	2.15993e+06	213752	1.12876e+07	1425.36	1878.81	850013	63018.5	468293	1.35254e+07	1.84819e+06	1.43468e+07	0	8623.18
		Sample46	P2A1.d	Sample		2023-09-27 22:44:57	2203.51	224329	1223	373.794	0	29.7001	87569.8	8.60438e+07	336359	0	1398.28	0	1246.34	76801.9	108396	5.4241e+06	1.18626e+07	1.83184e+06	32492.5	30591.9	6645.26	3.67749e+06	0	0	1.18221e+06	0	25216.7	272761	1010.12	1010.18	2.72159e+06	195333	8.3946e+06	0	0	497105	87937.9	290100	8.93567e+06	1.23381e+06	1.41403e+07	0	2356.61
		Sample58	P2B1.d	Sample		2023-09-28 16:48:41	1893.39	250924	6668.6	2030.94	0	302.889	158104	9.38945e+07	298775	0	481.065	0	3560.1	102092	163093	5.18762e+06	2.76954e+07	2.93262e+06	141014	146315	25473.7	8.25016e+06	0	75715.9	1.28646e+06	0	36606.3	386718	0	0	3.14939e+06	626306	8.77786e+06	4851.38	0	449884	147944	2.17063e+06	1.26095e+07	2.3656e+06	1.46606e+07	1141.14	21148.7
		Sample70	P2C1.d	Sample		2023-09-30 03:24:06	0	269702	7849.17	1530.99	0	476.298	97546.3	1.12768e+08	401326	0	390.344	0	697.954	150419	169358	6.1902e+06	2.08056e+07	3.02326e+06	60101.7	44050.7	7165.02	5.69974e+06	2739.77	4557.84	1.57152e+06	4492.3	50499.3	359194	0	0	3.52544e+06	255721	1.25068e+07	4319	3287.32	708799	170215	758869	1.23576e+07	1.8895e+06	1.92184e+07	0	16569.4
		Sample82	P2D1.d	Sample		2023-09-30 22:40:33	0	288722	3676.28	0.520386	0	0	134928	9.49067e+07	419841	23.401	0	0	2487.4	142103	151742	7.20165e+06	8.36521e+06	2.4043e+06	17423.8	74593.6	0	4.09212e+06	0	8353.33	2.02522e+06	1972.97	36327.5	188642	0	0	4.21457e+06	155863	1.1509e+07	0	0	536817	72197.4	12823.8	1.24975e+07	1.36397e+06	2.10362e+07	0	11615
		Sample94	P2E1.d	Sample		2023-10-01 20:24:06	2066.7	191161	4371.37	588.492	0	0	70765.3	9.21963e+07	322372	0	3629.38	0	1556.19	141066	156571	6.44935e+06	1.81725e+07	3.19299e+06	53492.5	50524.7	0	5.59981e+06	0	3167.5	1.66508e+06	0	32857.4	307380	0	0	3.33942e+06	213902	1.31505e+07	0	1751.51	736366	137068	256812	1.3467e+07	1.80043e+06	1.86552e+07	0	2891.24
		Sample106	P2F1.d	Sample		2023-10-03 23:38:58	0	258440	6686.63	7.06205	4.87523	0	76847.3	6.31054e+07	439616	1080.84	966.279	0	148.765	91533	94428.5	7.16955e+06	5.26739e+06	1.20648e+06	7129.81	40376.8	0	2.83713e+06	0	0	2.02385e+06	0	21628.5	88746.2	1121.91	0	4.71102e+06	95727.6	8.1086e+06	0	0	0	56477	156180	8.90878e+06	848049	2.16949e+07	0	3967.79
		Sample118	P2G1.d	Sample		2023-10-04 18:55:20	3862.87	152596	3728.93	5231.68	0	0	53891	6.97061e+07	527644	0	0	0	772.076	65321.5	101196	7.12291e+06	1.25124e+07	1.64447e+06	52733.8	42804.2	10289.2	3.41268e+06	1831.37	22171.1	2.69646e+06	0	18496.1	149833	28.8653	0	4.84605e+06	285444	4.36235e+06	0	0	296788	64415.5	1.05274e+06	6.63454e+06	1.09962e+06	1.98681e+07	0	11888
		Sample130	P2H1.d	Sample		2023-10-05 14:11:49	3612.44	224668	4102.1	515.854	0	0	76511.8	6.9288e+07	485819	0	868.754	0	1116.92	98466.9	128984	6.78507e+06	1.40769e+07	2.42384e+06	34488.2	26213.7	7864.21	4.44915e+06	0	4661.65	1.82107e+06	0	37326.6	310008	0	0	3.58147e+06	179270	7.39324e+06	0	0	506699	108834	630346	9.94445e+06	1.34822e+06	1.825e+07	0	1689.19
		Sample1	P3A1.d	Sample		2023-10-06 15:59:24	2702.19	182122	4671.09	9308.17	0	0	278010	8.3177e+07	286470	25.4725	1101.14	348.175	9033.4	114841	368492	5.00555e+06	2.82715e+07	3.1232e+06	203219	189707	53202.3	1.00106e+07	6210.4	75355.2	1.3384e+06	0	78015.6	580733	1716.21	1442.86	2.79813e+06	829069	8.4456e+06	10238		351629	164206	2.93213e+06	2.26805e+07	4.13018e+06	1.28564e+07	1475.32	39167.6
		Sample58	P3B1.d	Sample		2023-10-07 11:15:43	3484.81	151475	4770.27	250.694	5.13938	0	123308	8.23296e+07	253245	39.7585	741.791	289.236	455.535	114194	144812	4.22404e+06	1.15908e+07	2.22913e+06	37428.2	69444	11620.3	4.50376e+06	1654.07	14431.5	1.08332e+06	4205.4	41339	270307	0	0	2.06726e+06	164073	9.92924e+06	0	0	644926	156071	415263	1.26557e+07	1.64689e+06	1.29053e+07	0	10401.1
		Sample70	P3C1.d	Sample		2023-10-08 06:32:01	2706.28	87479.1	10006.5	13386	0	711.926	1.03676e+06	2.43796e+08	278277	0	840.746	22.6038	35571.6	464947	1.16531e+06	4.91495e+06	4.56208e+06	1.60876e+07	546153	506542	93137.7	2.51933e+06	24673.1	99047.3	1.1962e+06	0	268864	3.2597e+06	50.3689	0	2.3848e+06	1.55463e+06	4.17176e+07	0	0	1.6593e+06	898494	3.36755e+06	5.50474e+07	1.47582e+07	1.45545e+07	0	106383
		Sample82	P3D1.d	Sample		2023-10-09 01:48:23	3341.54	99961.5	5720.97	11.1307	215.916	0	149618	7.77833e+07	193771	0	470.525	466.69	1713.77	84729.8	159306	3.54326e+06	4.63393e+06	1.55664e+06	37717	55732	6548.73	3.26712e+06	0	0.38054	622648	0	29128.4	223367	0	0	1.547e+06	172196	1.10665e+07	3221.59		503890	57509.1	283611	1.3327e+07	1.32619e+06	1.02657e+07	0	13974.1
		Sample94	P3E1.d	Sample		2023-10-09 21:04:40	3289.59	87839.2	4418.45	6.88015	0	0	59696.2	6.28452e+07	157111	0	0	0	1025.82	64448.1	90919.1	2.99463e+06	4.97553e+06	1.08282e+06	15764.9	31201.1	2936.63	2.66852e+06	0	0	637479	0	23144.6	133008	1004.17	43.2602	1.42077e+06	127499	7.00262e+06	0	0	495910	45379.5	212992	7.24513e+06	897162	8.85045e+06	0	861.113
[truncated: 133 more columns]

## Sheet: ValueList_Helper
Sample
Blank
Cal
QC
CC
DoubleBlank
MatrixSpike
MatrixSpikeDup
MatrixBlank
TuneCheck
ResponseCheck
