# Supplementary material for: LOESS-based normalization workflow for targeted HDL glycoproteomics in an Alzheimer's disease cohort
Source: Royal Society of Chemistry journal article supplement (doi:10.1039/d6ra01426g), 2026-04-28
Supplement: d6ra01426g3.xlsx [file d6ra01426g3.xlsx]

## Sheet: Sheet1
					sigma_1	APOA1_LAEYHAK	sigma_3	FETUA_AHYDLR	sigma_4	APOD_VLNQELR	APOM_SLTSCLDSK	sigma_5	sigma_6	APOE_LGPLVEQGR	APOA4_LAPLAEDVR_z2	APOC2_TYLPAVDEK_z2	sigma_7	APOE_AATVGSLAGQPLQER_z2	sigma_8	sigma_9	APOM_AFLLTPR	sigma_10	APOC3_GWVTDGFSSLK	sigma_11	sigma_12	APOC3_94_0310	APOC3_94_0300	APOC3_94A_11000_z2	APOC3_94_1101	APOC3_94_1102	sigma_13	A1AT_107_5411	A1AT_271MC_5402	SAA4_94_5420_z4	A1AT_70_5402	APOA5_AQLLGGVDEAWALLQGLQSR_z3	PLTP_245_5412
Name	Data File	Acq. Date-Time	sample ID	status	Resp.	Resp.	Resp.	Resp.	Resp.	Resp.	Resp.	Resp.	Resp.	Resp.	Resp.	Resp.	Resp.	Resp.	Resp.	Resp.	Resp.	Resp.	Resp.	Resp.	Resp.	Resp.	Resp.	Resp.	Resp.	Resp.	Resp.	Resp.	Resp.	Resp.	Resp.	Resp.	Resp.
	QCinst1.d	2023-09-20 17:21:41			133967	4.2509e+07	119143	25512.4	2.17076e+06	1.28843e+07	1.32659e+06	405572	961048	2.67681e+06	19948.7	4.32289e+07	4.95511e+06	2.56508e+06	2.02594e+06	901929	9.30495e+06	2.36047e+06	9.94002e+06	95022.5	592557	51540.6	7.82024e+06	466722	3.01764e+06	915567	36164.6	552472	24843.9	242757	2.1258e+07	0	0
Sample2	P1C1.d	2023-09-20 18:33:36	QC1		147039	8.41969e+07	224982	101302	3.84584e+06	1.49074e+07	4.46912e+06	913371	1.61738e+06	8.80069e+06	399155	1.55422e+07	1.04795e+07	9.58829e+06	4.17698e+06	1.77806e+06	3.01382e+07	5.82929e+06	2.19928e+06	214119	2.02432e+06	439293	1.56695e+06	157778	968193	233312	84028.5	483673	898103	751509	7.29417e+06	83576.5	605211
Sample4	P1C3.d	2023-09-20 19:45:44	S001	AD	107113	8.77785e+07	203119	83624.5	3.51704e+06	1.75325e+07	5.38567e+06	923197	1.6669e+06	6.16348e+06	416664	1.77e+07	1.00133e+07	5.78326e+06	4.20342e+06	1.59307e+06	2.16759e+07	6.52669e+06	2.86619e+06	174728	1.96427e+06	100767	1.48147e+06	101640	606454	174330	55297.3	203783	1.36591e+06	506893	1.72483e+07	81754.4	810501
Sample5	P1C4.d	2023-09-20 20:58:02	S002	Control	115556	9.91312e+07	214578	88095.9	3.64003e+06	1.72904e+07	5.92379e+06	946373	1.94467e+06	6.67865e+06	660762	2.43563e+07	1.13269e+07	6.47106e+06	4.42554e+06	1.65185e+06	3.11418e+07	7.41565e+06	3.99847e+06	219218	1.65139e+06	76776.8	2.97343e+06	198242	1.33278e+06	339912	61479	846010	690472	865348	2.3116e+07	80464.5	388843
Sample6	P1C5.d	2023-09-20 22:10:19	S003	Control	235011	1.11069e+08	217840	115413	3.61197e+06	4.38909e+07	1.95855e+07	982695	2.04722e+06	6.52186e+06	107062	1.51061e+07	1.04721e+07	3.73521e+06	4.32587e+06	1.57438e+06	5.00018e+07	7.50143e+06	3.00897e+06	220839	1.69535e+06	48485.8	635368	36365.8	795310	243311	48336.9	77061.6	468659	233492	3.07945e+07	48194.1	1.07694e+07
Sample7	P1C6.d	2023-09-20 23:22:37	S004	AD	251746	7.00373e+07	197922	50053.8	3.90146e+06	1.8149e+07	8.84808e+06	829395	1.64991e+06	5.20743e+06	39358.6	1.8166e+07	1.01234e+07	3.42899e+06	3.73282e+06	1.94862e+06	3.04811e+07	7.25261e+06	2.52031e+06	223518	1.52667e+06	11012.4	450307	42741.7	449115	164606	38266	60181.7	124550	67347.4	1.78732e+07	0	2.91216e+06
Sample8	P1C7.d	2023-09-21 00:34:54	S005	Control	218190	1.08467e+08	176594	127827	3.23988e+06	3.19991e+07	1.90115e+07	824438	1.49396e+06	8.99822e+06	50419.8	4.13321e+07	8.37741e+06	6.68798e+06	2.90335e+06	1.42433e+06	5.28166e+07	5.57281e+06	5.5906e+06	189075	1.00395e+06	29814	782446	54353.6	1.74083e+06	680112	27772.9	38016.4	233252	117108	4.51547e+07	12804.5	9.28142e+06
Sample9	P1C8.d	2023-09-21 01:47:12	S006	MCI	157734	6.14223e+07	215749	43496.2	3.86597e+06	1.64926e+07	4.26866e+06	843458	1.86025e+06	2.26083e+06	84580	4.00149e+06	8.81873e+06	1.95393e+06	3.47972e+06	1.34304e+06	1.98287e+07	7.13483e+06	848641	164304	1.31342e+06	14500.5	320857	15538.4	89898.4	33762.2	39133	75851	511765	111829	4.63832e+06	39013	1.06949e+06
Sample10	P1C9.d	2023-09-21 02:59:29	S007	Control	154806	9.64136e+07	220759	90549.5	4.01057e+06	1.62672e+07	6.00643e+06	793970	1.65265e+06	9.2945e+06	467597	1.28027e+07	9.9822e+06	9.20633e+06	3.50376e+06	1.79682e+06	3.24757e+07	7.73798e+06	3.20933e+06	183477	1.63566e+06	202470	1.39764e+06	113863	745244	176573	45940.7	623350	1.72661e+06	489078	1.29704e+07	163293	1.71617e+06
Sample11	P1C10.d	2023-09-21 04:11:46	S008	MCI	149818	9.6159e+07	233597	77545.8	3.69415e+06	1.40415e+07	5.23299e+06	1.04602e+06	1.67706e+06	2.76403e+06	494041	1.69234e+07	1.04815e+07	2.47401e+06	4.54309e+06	1.65397e+06	2.60131e+07	8.2556e+06	4.24902e+06	204834	1.70292e+06	112740	2.75951e+06	148853	756773	119599	48441.5	1.07494e+06	567475	623319	1.37848e+07	126870	253917
Sample12	P1C11.d	2023-09-21 05:24:03	S009	Control	142702	6.16959e+07	239070	34143.9	3.9601e+06	1.00974e+07	2.62342e+06	962598	1.63233e+06	1.00415e+06	261141	3.6018e+06	1.09231e+07	977084	4.61029e+06	1.67693e+06	1.7333e+07	8.36413e+06	1.23319e+06	213833	1.66925e+06	17298.8	485631	18074.9	141596	54305.8	38720.3	190566	340835	175716	5.62814e+06	79035	270741
Sample13	P1C12.d	2023-09-21 06:36:20	S010	MCI	197606	9.16507e+07	293430	54840.5	4.93375e+06	2.35691e+07	4.55288e+06	1.24999e+06	2.18409e+06	5.58326e+06	437957	9.72278e+06	1.07806e+07	4.33817e+06	5.08557e+06	2.02409e+06	2.23823e+07	8.62038e+06	4.06585e+06	262782	2.02313e+06	45813.2	1.82075e+06	74860.4	575047	152634	46780.6	193950	853069	414562	1.88018e+07	55980.1	784653
	QCinst2.d	2023-09-22 17:59:12			186152	5.28486e+07	157669	35112.7	2.47823e+06	1.50467e+07	1.34732e+06	688897	1.28139e+06	2.76948e+06	7322.43	5.26277e+07	6.90219e+06	2.6608e+06	2.01918e+06	1.0009e+06	8.28344e+06	3.02526e+06	1.0116e+07	71831.7	709421	77479.8	6.93765e+06	503530	2.70239e+06	888001	40819.7	413776	74377	330685	2.12e+07	0	0
Sample14	P1D1.d	2023-09-22 19:11:08	QC1		174102	1.17523e+08	305582	123323	4.64609e+06	3.59565e+07	9.88532e+06	1.16563e+06	2.11132e+06	1.33213e+07	529582	1.88617e+07	1.37847e+07	9.56004e+06	4.78039e+06	2.1141e+06	4.76247e+07	8.20006e+06	2.93521e+06	227049	3.14984e+06	633420	1.96783e+06	178263	1.11292e+06	255719	362557	503666	668096	332264	9.70581e+06	89886.9	335256
Sample16	P1D3.d	2023-09-22 20:23:16	S011	Control	180612	9.11992e+07	312977	80224.7	4.52487e+06	1.31396e+07	6.97197e+06	1.20328e+06	2.36212e+06	6.44896e+06	363895	7.4479e+06	1.3213e+07	5.63806e+06	4.66786e+06	1.92396e+06	3.22783e+07	7.81878e+06	1.13353e+06	238443	2.66822e+06	153423	803378	55272.5	305983	77515.2	208158	322985	999749	490083	7.35878e+06	130320	355386
Sample17	P1D4.d	2023-09-22 21:35:32	S012	MCI	134689	7.39918e+07	248626	54281.1	4.25254e+06	1.52736e+07	5.11637e+06	976500	1.90367e+06	4.84581e+06	207244	5.90791e+06	1.09551e+07	4.25556e+06	3.72289e+06	1.96295e+06	2.64923e+07	6.28376e+06	1.23277e+06	180176	2.15199e+06	38876.5	780871	34646	214601	28133.3	144895	190090	1.10533e+06	311214	4.54366e+06	93250.5	346839
Sample18	P1D5.d	2023-09-22 22:47:50	S013	AD	176902	8.93181e+07	270888	76096.4	4.53772e+06	3.03651e+07	1.01958e+07	1.08681e+06	2.27444e+06	6.57956e+06	166584	2.74833e+07	1.24727e+07	4.08226e+06	3.70896e+06	2.13762e+06	3.86858e+07	9.47585e+06	4.60923e+06	235987	2.43808e+06	177403	2.73988e+06	123720	1.12959e+06	302967	124854	558520	963831	589279	2.69811e+07	54587.4	1.6862e+06
Sample19	P1D6.d	2023-09-23 00:00:08	S014	MCI	261809	9.80379e+07	268710	109685	4.68521e+06	3.03441e+07	1.20669e+07	1.16983e+06	2.63568e+06	1.48127e+07	75237.7	2.62289e+07	1.29245e+07	9.90729e+06	4.56533e+06	2.21849e+06	4.15062e+07	8.92336e+06	3.72642e+06	208350	2.32593e+06	43248.5	1.01741e+06	60966.7	763015	310444	88348	192183	746397	256203	3.50219e+07	66499.7	1.16144e+07
Sample20	P1D7.d	2023-09-23 01:12:26	S015	AD	93098.8	1.10871e+08	207043	99371.5	3.73303e+06	2.20778e+07	5.75895e+06	902005	1.55103e+06	5.14095e+06	425537	7.52299e+06	1.02191e+07	5.21252e+06	4.19195e+06	1.58968e+06	3.23896e+07	6.76465e+06	1.81637e+06	198355	2.25573e+06	119475	1.74856e+06	137035	813580	113614	80632.5	410450	2.67963e+06	712808	1.00702e+07	126452	943043
Sample21	P1D8.d	2023-09-23 02:24:42	S016	AD	139838	9.34688e+07	246139	86400.3	4.37063e+06	2.74311e+07	1.1279e+07	1.12123e+06	2.45241e+06	8.99937e+06	206618	1.33068e+07	1.15984e+07	5.77148e+06	4.14521e+06	2.23291e+06	4.05568e+07	7.43621e+06	1.88982e+06	234122	1.91315e+06	55627.9	881780	57027.8	397398	89171.4	60068.1	185994	1.58738e+06	283158	1.6728e+07	95861.6	2.70359e+06
Sample22	P1D9.d	2023-09-23 03:36:59	S017	AD	136245	1.17652e+08	225688	120119	3.82425e+06	2.74117e+07	8.82165e+06	711680	1.97956e+06	1.53561e+07	552106	5.83137e+06	1.07941e+07	1.1385e+07	4.38396e+06	1.56662e+06	4.33833e+07	6.50382e+06	3.7153e+06	180060	1.9108e+06	52061.5	799494	39557.7	372879	94774.8	56134.7	206100	2.15357e+06	223125	1.02739e+07	137934	2.511e+06
Sample23	P1D10.d	2023-09-23 04:49:17	S018	AD	140441	5.9738e+07	243964	43679.3	4.618e+06	1.28787e+07	5.08635e+06	985343	2.74916e+06	1.81033e+06	208393	1.62628e+07	1.07558e+07	1.76253e+06	4.53517e+06	2.10821e+06	2.74275e+07	8.83153e+06	4.98178e+06	228071	2.06086e+06	68417.7	2.90533e+06	136379	871643	149388	64006	245876	808597	1.07554e+06	1.30117e+07	14070.4	371219
Sample24	P1D11.d	2023-09-23 06:01:34	S019	Control	151363	9.55603e+07	204349	79373.6	3.84049e+06	1.93271e+07	8.15835e+06	745137	1.75541e+06	6.33783e+06	417378	5.97851e+06	1.14906e+07	5.30433e+06	4.05584e+06	1.8461e+06	3.84775e+07	7.51263e+06	1.14345e+06	185505	1.84417e+06	98531.4	688742	45195.2	355195	89128.8	51964.6	833867	1.38176e+06	582854	1.03568e+07	136922	1.45169e+06
Sample25	P1D12.d	2023-09-23 07:13:51	S020	Control	171253	8.70683e+07	306193	63377.7	5.32745e+06	1.27719e+07	3.6938e+06	1.28909e+06	2.26953e+06	7.87418e+06	466970	3.68513e+07	1.46159e+07	7.63383e+06	5.43842e+06	2.59571e+06	2.94185e+07	1.03346e+07	7.52349e+06	317678	2.28667e+06	230579	7.77041e+06	668402	3.661e+06	528574	67093.2	595263	3.19919e+06	2.89362e+06	2.7173e+07	129021	638657
Sample25	QCinst3.d	2023-09-23 09:37:56			144259	4.91873e+07	152046	37476.6	2.37356e+06	1.46193e+07	1.57457e+06	572540	1.11622e+06	2.9548e+06	15162.4	5.42588e+07	7.06375e+06	2.45597e+06	2.60886e+06	1.08716e+06	1.16865e+07	3.81769e+06	1.19378e+07	136088	779459	59407.7	8.54513e+06	480372	3.58404e+06	978652	30851.4	975924	110765	416707	2.76268e+07	0	0
Sample26	P1E1.d	2023-09-23 10:49:42	QC1		145218	1.34391e+08	269885	133671	4.77955e+06	3.38898e+07	9.08064e+06	1.11307e+06	2.23487e+06	1.37207e+07	796861	1.75777e+07	1.28118e+07	1.09438e+07	4.87006e+06	2.18182e+06	4.81906e+07	9.69311e+06	2.45362e+06	241714	2.38706e+06	518473	2.36151e+06	162041	1.46014e+06	286078	83757	634735	791141	673539	1.25635e+07	60694.6	334884
Sample28	P1E3.d	2023-09-23 12:01:50	S021	AD	140967	7.79311e+07	241450	55120.1	3.84054e+06	2.11979e+07	4.26454e+06	1.03922e+06	1.56894e+06	3.8126e+06	169344	7.9011e+06	1.10318e+07	2.37713e+06	3.70479e+06	1.87522e+06	2.06458e+07	6.91528e+06	1.51262e+06	255845	1.68178e+06	50363.4	958570	34331	256476	66032.2	54095.2	243304	940340	215798	9.83766e+06	49442.3	706155
Sample29	P1E4.d	2023-09-23 13:14:07	S022	MCI	122371	1.09156e+08	228776	98368.7	3.93432e+06	1.30523e+07	3.22703e+06	868894	1.72372e+06	5.73455e+06	729877	1.2191e+07	1.04067e+07	5.32038e+06	4.21622e+06	1.77354e+06	2.19693e+07	7.73987e+06	1.8751e+06	220909	1.57382e+06	115589	2.56975e+06	265069	1.81975e+06	326337	50610	348468	1.22498e+06	1.02675e+06	1.06842e+07	147766	272769
Sample30	P1E5.d	2023-09-23 14:26:25	S023	AD	126474	8.93095e+07	178482	61965.3	4.09783e+06	2.48336e+07	5.68229e+06	1.01084e+06	1.88854e+06	5.91923e+06	433209	2.18356e+07	1.10141e+07	4.20053e+06	3.88485e+06	1.7699e+06	2.89982e+07	8.05975e+06	2.56146e+06	202826	1.74239e+06	107753	3.21466e+06	166704	939297	140371	43307	273396	1.34523e+06	756182	1.50681e+07	95928.2	260567
Sample31	P1E6.d	2023-09-23 15:38:44	S024	AD	120071	8.29649e+07	217507	55950.8	3.38173e+06	2.20701e+07	6.65937e+06	842055	1.68821e+06	6.62588e+06	267728	1.10114e+07	1.10621e+07	4.75012e+06	3.98317e+06	1.82756e+06	2.79793e+07	7.86214e+06	1.44658e+06	219661	1.6412e+06	75543.7	1.30669e+06	71226.9	480775	92134.6	41171.9	422979	1.34231e+06	404234	1.16963e+07	46308.7	631771
Sample32	P1E7.d	2023-09-23 16:51:01	S025	Control	119891	8.66055e+07	186399	71013.2	3.61351e+06	1.50066e+07	4.84739e+06	970217	1.96419e+06	3.36241e+06	351230	8.85672e+06	1.08907e+07	2.95111e+06	3.96716e+06	1.60785e+06	2.71551e+07	8.32965e+06	1.47102e+06	260659	1.62594e+06	71742.5	1.33124e+06	50899.7	358054	84358.8	40161.4	204928	1.09024e+06	470674	1.0204e+07	118854	444418
Sample33	P1E8.d	2023-09-23 18:03:18	S026	MCI	116165	9.49315e+07	216778	70363.7	3.87883e+06	1.7232e+07	7.95292e+06	1.00035e+06	1.89218e+06	9.49083e+06	380003	8.39431e+06	1.11098e+07	7.50016e+06	4.15952e+06	1.91465e+06	4.22707e+07	7.52839e+06	976903	135255	1.76049e+06	56122.9	785860	40214.7	268972	38473.5	46051.8	185225	1.12035e+06	448290	7.07683e+06	41557.6	451441
Sample34	P1E9.d	2023-09-23 19:15:36	S027	AD	119632	7.38945e+07	164199	65161	3.58287e+06	1.56176e+07	2.9528e+06	878271	1.47618e+06	2.15172e+06	239371	7.71572e+06	1.05376e+07	1.46768e+06	3.90795e+06	1.64539e+06	1.63539e+07	7.8247e+06	1.26342e+06	169017	1.50672e+06	52562.6	766649	44599.6	228708	56826.8	36024.4	201739	1.11114e+06	317318	6.48003e+06	65815.9	505704
Sample35	P1E10.d	2023-09-23 20:27:53	S028	MCI	119895	7.43215e+07	212449	63447.2	3.57253e+06	2.08428e+07	5.83013e+06	973458	1.8148e+06	1.54014e+07	190430	5.73306e+06	9.76901e+06	1.19149e+07	3.7778e+06	1.77675e+06	3.09776e+07	6.26047e+06	1.10927e+06	209375	1.75172e+06	63268.5	687083	22179.9	172290	54523.6	38276.8	322970	1.15461e+06	330850	9.83487e+06	83638.7	1.37431e+06
Sample36	P1E11.d	2023-09-23 21:40:11	S029	Control	128150	7.92772e+07	191435	31953.6	2.9303e+06	1.71091e+07	6.38739e+06	869640	1.45222e+06	6.24008e+06	174785	1.47957e+07	1.02268e+07	5.53229e+06	4.21814e+06	1.54709e+06	3.24219e+07	6.75255e+06	1.58591e+06	225937	1.52384e+06	64628.9	1.16618e+06	49342.5	355857	58344.5	38599.3	234337	1.286e+06	478565	8.70379e+06	80712.1	363893
Sample37	P1E12.d	2023-09-23 22:52:28	S030	AD	160858	6.43966e+07	259150	43027.2	4.16438e+06	1.21749e+07	3.19349e+06	978747	2.04693e+06	4.32047e+06	330541	2.63235e+07	1.29616e+07	3.07015e+06	4.69501e+06	2.51766e+06	2.02764e+07	9.40377e+06	6.9655e+06	333843	1.86905e+06	183741	5.87422e+06	354386	2.33598e+06	414084	52622.3	431181	1.61594e+06	2.24997e+06	3.49137e+07	78330.8	638558
Sample37	QCinst4.d	2023-09-24 01:16:00			156609	47656300	153637	31289	2150689	13232457	1526262	506772	1366506	3323424	66188	49811281	7783563	2151797	2686651	1143123	11250298	3303144	12746896	90794	773234	103922	8518818	419720	3643035	967616	29564	1074476	43737	294928	27543901	0	8944
Sample38	P1F1.d	2023-09-24 02:28:00	QC1		131683	104947890	254743	91207	4159460	25930371	7094774	1003832	1941727	10180544	568869	11979002	12158298	8205131	4337221	1942305	39055045	6274129	1735434	244234	1961579	452755	1771639	140286	1008444	217427	124290	535311	628707	671197	10531863	131788	275758
Sample40	P1F3.d	2023-09-24 03:40:00	S031	Control	142086	108911694	192716	74100	3606507	19638358	8588128	930938	1770509	6576328	301044	7057764	10845660	4493640	3423269	1516672	32667987	6432979	1047056	195490	1593401	110807	517995	27692	197093	46658	82696	258153	687235	74545	5978771	55816	829911
Sample41	P1F4.d	2023-09-24 04:52:00	S032	AD	120400	80528625	186274	52026	3391225	18713770	5336562	1263871	1713370	6235955	152161	5571767	11161575	4455953	3342462	1592031	22788088	5997481	950159	191688	1717310	27193	522980	16961	156275	34082	88124	140300	680759	281541	6823837	60628	573837
Sample42	P1F5.d	2023-09-24 06:05:00	S033	Control	140005	59302325	200900	29908	3678631	14702910	3274358	1094235	1684084	2246851	84457	4154977	10283939	1292057	3716027	1731807	17309878	6418629	1156208	176916	1798649	26805	758863	18123	130213	20017	72518	171805	968015	227167	4267761	52457	331633
Sample43	P1F6.d	2023-09-24 07:17:00	S034	Control	123235	93103889	217195	66073	3642937	15984733	5017326	951852	2027507	5179807	333916	21510260	11396433	3101764	4133369	2004136	22786812	7252154	3095484	225042	2318884	132029	3912225	262947	1549366	245549	86872	1845586	604148	810778	12076269	114622	73885
Sample44	P1F7.d	2023-09-24 08:29:00	S035	Control	114811	79824868	170485	60398	3533340	19516235	6199145	1036552	1815053	1992979	179967	15472452	10831618	1258975	3504092	1534860	25589114	6811736	2774263	159016	1781599	87617	2034429	72796	524057	104288	48337	195189	1307635	322897	11053100	51289	531003
Sample45	P1F8.d	2023-09-24 09:41:00	S036	AD	146028	70241808	222364	34069	3734566	21771471	4041626	1030547	1773699	1843995	200286	8576055	11881620	1087160	4878722	2288392	23591392	9000121	3219443	361532	2132052	58476	2563268	91199	694326	123199	55309	899429	583543	539699	10211341	43403	208927
Sample46	P1F9.d	2023-09-24 10:54:00	S037	Control	147478	93258278	203817	53722	3489072	13084237	6150206	836137	1611312	2736616	337348	13427200	11285687	2398103	4089076	1782420	27909645	7485580	3827204	227177	1439385	113175	3528055	131230	829716	119918	30135	416268	2362084	707159	16690712	93996	773739
Sample47	P1F10.d	2023-09-24 12:06:00	S038	Control	145655	64648794	202866	42422	3533628	9488584	4029285	781614	1677554	2708324	163996	7932192	10117430	1779354	4102854	1693890	20475807	7236370	1861054	154381	1593309	56975	1334298	34004	333087	50311	43824	299687	658087	399780	8819966	30485	283356
Sample48	P1F11.d	2023-09-24 13:18:00	S039	AD	160285	98186969	228358	83248	3670716	23747241	5465693	925931	1891572	4126016	278530	11152293	11155048	2573515	4000148	1732472	23933968	6997800	1710764	203794	1506993	54628	1107528	31435	306834	55737	34408	176811	1363956	385205	8735200	114053	777237
Sample49	P1F12.d	2023-09-24 14:31:00	S040	AD	160051	86985963	213827	66698	3928811	24139568	10024398	993493	2028868	13258670	205460	13431514	11644129	8913189	3865789	1564481	36202117	6496045	2271612	207588	1670418	46882	1096051	33416	339008	94498	33620	156309	1664007	454462	17263119	90191	4239444
Sample49	QCinst5.d	2023-09-24 16:55:00			151123	40930823	145357	18206	1968400	12318135	1383265	519820	924135	2784392	63540	51722238	6371852	2011822	2440662	955039	8836173	3327483	10968287	102013	787294	69898	8191812	472983	3277820	880529	29958	948487	61931	267900	25223429	0	22064
	QCinst6.d	2023-09-25 17:47:00			161237	51160151	139315	26750	2373592	14057157	1410280	598854	1118809	2880988	58063	51199722	6996817	2151248	2353849	1118799	11729829	3670508	11057207	135632	776836	71943	8190676	412789	3475365	681999	26426	654850	41828	200310	19787868	0	8206
Sample14	P1B1.d	2023-09-25 18:59:00	QC1		145652	109653061	214811	96679	4116012	30505886	8497340	848084	1881690	9954720	378394	13757703	11269129	6787317	3379854	1876098	40580100	6940747	1523503	158928	1986366	388352	1369321	108477	885499	174246	180053	531434	688966	442137	9419211	50795	283481
Sample16	P1B3.d	2023-09-25 20:12:00	S041	AD	121151	82060720	219615	91285	3990372	28428456	7079477	906653	2188406	8124708	326138	18467744	12456763	5682550	3910245	1887138	33374414	8089307	1946464	202217	2224466	128237	1671598	118920	818334	164062	106060	503409	1215065	663507	11176098	0	352912
Sample17	P1B4.d	2023-09-25 21:24:00	S042	Control	240724	118064836	241999	171235	3869654	35792751	19489300	872182	2295602	19527906	296996	20431578	11055229	16149376	4075453	1988349	68935750	7408705	1833462	185959	2070855	75310	704084	26138	441998	137495	100007	302992	1534076	480865	21542373	143337	6715173
Sample18	P1B5.d	2023-09-25 22:36:00	S043	Control	324319	91983431	249775	120838	3961860	25131566	13696648	1087533	2480807	8851887	127064	12473038	12665416	4557301	4032877	1763298	44803089	7674320	2553755	176839	1804711	16139	428162	7460	365738	106154	77804	64904	582523	113625	15919139	23852	5231161
Sample19	P1B6.d	2023-09-25 23:48:00	S044	Control	143924	37496721	231626	28497	4180990	10042596	1874300	1072785	1808694	930179	36958	8976077	12094800	718522	3798023	1740203	10105757	6366685	1598263	234444	1904422	35169	1085449	33856	179866	31161	72394	44733	274237	164661	3531336	38935	131881
Sample20	P1B7.d	2023-09-26 01:01:00	S045	MCI	361086	66274814	226814	74294	3825460	22231570	10910526	926727	1997150	4467254	27270	31984452	10839411	2001902	3957838	1694399	36942689	6799224	6575205	183270	1471817	22036	765996	48824	1752669	792129	47767	33224	84340	39039	25626648	14399	2284667
Sample21	P1B8.d	2023-09-26 02:13:00	S046	Control	390514	49904038	231868	36200	4124078	15334067	4871827	1261615	2724174	1526006	12115	8001410	10670902	496262	3527999	1779331	17526270	7795334	4555106	178317	1662070	6329	209153	9185	429038	339951	44886	28703	19904	27687	6696993	0	2094769
Sample22	P1B9.d	2023-09-26 03:25:00	S047	Control	156039	62892931	271267	50838	4456772	16873014	4935428	1242137	2141147	4990719	98213	11205255	12256021	2557036	4624566	2138144	20185107	7143689	1333858	225293	1936879	47306	785906	33362	289261	82225	56573	126064	510069	268276	7039172	62186	279189
Sample23	P1B10.d	2023-09-26 04:38:00	S048	MCI	119190	73219719	231726	79448	3932114	8036794	3593523	995192	1556802	6201197	516704	3943131	11172908	4963326	4111975	1646229	24602114	7540851	663966	272883	1816637	50138	450501	43161	308193	73196	55533	406138	466034	395516	3528798	84805	560074
Sample24	P1B11.d	2023-09-26 05:50:00	S049	Control	144498	72715326	202745	61232	3831267	9660949	2941439	985392	1792995	2776641	417257	5357211	11287286	2117410	4376047	1708012	21185140	9347724	1033558	210926	2190593	35109	978726	48002	309124	46031	55121	195513	542848	682144	9815882	117251	278527
Sample25	P1B12.d	2023-09-26 07:02:00	S050	Control	193058	78286314	247941	66601	4075753	26586393	7209563	1043298	2020609	2796071	176717	12163452	13098390	1824250	4423848	1899626	28344314	8651355	3054104	243882	2153363	125991	1970403	56813	395310	58010	61339	523796	2146033	545310	11623021	78409	1079681
Sample25	QCinst7.d	2023-09-26 09:26:00			68636	47344013	125192	30061	2197554	13219211	1558644	647165	993688	2938897	59519	47441316	6652616	1981299	2266080	877300	8743897	3829288	10380933	107094	798973	57381	7929554	408827	3391557	804400	25609	810647	27423	309318	22293240	0	28363
Sample26	P1G1.d	2023-09-26 10:38:00	QC1		110742	102398938	247656	128044	4138821	21231650	6650468	1234653	2141247	11687649	840589	13853546	11560389	10490565	5048111	2047291	44086421	8343471	1691167	185835	2503994	456505	1496201	129151	989921	178930	129521	501278	177810	569841	6106111	101049	45035
Sample28	P1G3.d	2023-09-26 11:50:00	S051	AD	198036	66224254	247767	44964	4268870	12175483	4493383	1169307	2664678	3761620	208665	10880970	12875813	2894202	5225078	2052161	24288988	9310496	1184555	257088	2276022	30171	996981	34043	265001	15410	52182	123371	618774	410975	6499983	56361	162837
Sample29	P1G4.d	2023-09-26 13:02:00	S052	AD	174735	80320941	226361	49755	4466362	21937040	4252331	1107477	2000495	7042409	336459	1646582	13479445	4331338	4698558	2020319	25477505	9526388	666801	228124	1906657	61859	424180	21033	130523	35551	43518	182216	570386	317396	7079474	65139	420949
Sample30	P1G5.d	2023-09-26 14:15:00	S053	Control	100355	90654060	181917	98643	3095314	16855219	5715396	571244	1895507	7929084	548040	6569225	10257550	6287133	3593352	1561460	33897784	7580149	808175	174909	1528691	126812	859216	50256	390856	105976	41990	173470	1086874	538669	5629995	80588	437837
Sample31	P1G6.d	2023-09-26 15:27:00	S054	AD	147222	57575840	190743	46807	3512655	14231061	3995897	901315	1783807	4347335	214699	5831593	11752033	3038614	3938878	1803631	25310387	6370031	808032	179473	1690858	34977	351414	12358	132162	37039	75506	154686	200602	195162	4200442	52223	71935
Sample32	P1G7.d	2023-09-26 16:39:00	S055	MCI	140358	59482855	194166	46877	3917733	11578206	4301250	1117353	1799892	1922286	151287	9112460	10710161	1315044	3642879	1608565	25422998	8242523	1697599	178398	1729832	58822	1032267	38057	304368	56067	45786	191774	901582	597419	9385179	86320	474152
Sample33	P1G8.d	2023-09-26 17:52:00	S056	Control	155059	113870920	245942	121755	4380158	20099552	10064986	1122878	2079822	17031419	817494	17326097	12621847	17446142	4724086	1941099	55319555	9277455	1498391	260366	1804204	169625	1346017	67343	618970	113458	50531	360710	1806570	754366	4617528	209129	1250125
Sample34	P1G9.d	2023-09-26 19:04:00	S057	AD	133212	58146819	206272	34238	3800931	8976588	3370987	846658	1985246	5610160	244544	5311946	10166628	5224253	4690467	1756182	20795335	9121322	1025432	145224	1582116	44996	898721	37114	212574	28191	39174	183439	931338	557032	5962828	78902	271078
Sample35	P1G10.d	2023-09-26 20:16:00	S058	MCI	127701	63868715	184961	45717	3827160	8110705	3979124	1012726	2034501	3410667	274260	10444933	11781719	3143584	4494501	1904988	24771455	7440484	2056733	214581	1662393	64941	2098769	82377	575909	78234	30689	334134	645453	1061653	11572493	132342	152965
Sample36	P1G11.d	2023-09-26 21:28:00	S059	Control	127751	80156279	238447	61895	4212096	7740164	4240671	1099533	1588694	2436604	710228	10690620	13966638	2285658	4771485	1966101	30071345	7752495	1173589	246694	1681598	59368	873769	43066	343600	65783	40585	514746	185636	306428	5855277	126901	69265
Sample37	P1G12.d	2023-09-26 22:41:00	S060	Control	180888	117482900	192648	191657	3873320	37845722	24086766	975550	1672148	25900921	380670	38917844	11266252	22222808	3863935	1500394	61544815	7435061	3737079	193209	1432263	152166	840109	48281	1218074	535255	30122	149724	695385	347621	58035097	55894	9034178
Sample37	QCinst8.d	2023-09-27 01:05:00			143583	43614477	108179	30206	2237892	13536100	1358179	641089	1086230	3107367	105104	49593805	6462411	2069833	2124347	962717	10981527	3843940	12436936	115881	748146	62418	8761402	423530	3252926	756329	32103	866434	41140	285917	19743548	0	17187
Sample38	P1H1.d	2023-09-27 02:17:00	QC1		160765	85234528	278916	98505	5356139	10589678	4436022	1174721	2159933	11287646	850013	13525425	14346804	11355052	6376957	2736637	34131569	11011914	1547018	233466	3218033	440950	1827026	151839	1201638	212220	113908	587510	672884	775840	3015687	153008	266162
Sample40	P1H3.d	2023-09-27 03:29:00	S061	AD	160349	102462736	256128	106273	4459830	19515681	7785075	1264945	2472804	9283017	926531	11861336	13722603	8279211	6147002	2420461	45355454	11382107	1251273	304975	2849273	84426	1116764	54315	468260	89871	74865	903088	1193790	757704	5620177	179214	558034
Sample41	P1H4.d	2023-09-27 04:41:00	S062	AD	148498	89008531	215771	80874	4005159	9506352	3522359	978185	1717181	6565839	662982	2375367	12118237	6903917	4907168	1931525	25973483	9101389	675079	242179	1997487	59188	657897	57251	370857	53506	57271	343691	982547	478811	1149765	177135	645430
Sample42	P1H5.d	2023-09-27 05:53:00	S063	Control	150961	72385511	240079	66282	4605630	6972951	4322299	1136700	2388915	8971934	248747	4774176	13428155	8911448	5431229	2166544	29714433	9654099	1008412	255780	2178441	82434	476777	25152	178422	42233	55433	133791	699129	493709	4472643	80197	257919
Sample43	P1H6.d	2023-09-27 07:06:00	S064	Control	147813	54110882	243962	24423	4387008	10207098	3926084	1141891	2563266	1190688	121521	2715470	12621350	851193	5251277	2460052	21763089	10365326	1082729	351550	2025541	28826	308328	4799	71920	19885	53404	194258	256307	238040	3205782	89341	256819
Sample44	P1H7.d	2023-09-27 08:18:00	S065	Control	140286	63744184	207822	53114	3637835	10827964	2927705	954149	2011181	4530430	300964	5684402	11967354	4438046	4386408	2108960	18266589	8924378	863872	264216	2005188	42186	369873	17385	146396	42034	51916	174309	264101	215134	5475740	60439	299238
Sample45	P1H8.d	2023-09-27 09:30:00	S066	AD	164964	106753953	251993	109918	4307000	13071226	5186351	1263136	2009007	3136269	815700	11842233	12392086	3207846	5717275	2271288	30146120	8829952	2353454	284353	1866308	149683	2440273	173795	1181028	162566	36810	439893	2127842	1678308	8049604	185777	685772
Sample46	P1H9.d	2023-09-27 10:42:00	S067	Control	172785	102062928	240942	107082	4741479	13395902	10670240	1032969	2344140	14214137	806738	15518962	13508762	17975577	5966717	2181927	58923060	8965314	1604643	260155	2245060	130112	1314080	72591	588409	137579	50381	193154	1896423	1033425	5673832	192591	895043
Sample47	P1H10.d	2023-09-27 11:55:00	S068	MCI	158470	74917600	236957	45473	4360871	14438467	4315788	975854	1907112	5316360	445485	23847067	11882953	4244714	4569226	1804574	24147408	6422399	4054964	221132	1629895	95492	3766936	170350	1273461	166985	30357	63891	1549102	1908638	28001903	116392	606361
Sample48	P1H11.d	2023-09-27 13:07:00	S069	Control	155423	76150207	287089	60749	4641184	15570054	5166638	1313969	2078186	5224444	406060	5315230	14674672	3191390	5676836	2381707	29584008	9295128	1330078	295186	1846685	73250	803315	32748	251468	49811	40613	152696	908986	474811	7695727	164575	376402
Sample49	P1H12.d	2023-09-27 14:19:00	S070	AD	137166	84837135	331585	73041	5093549	13937270	4415758	1357059	2146996	2268109	310996	9417443	15210360	1322464	5788959	2787561	26955030	11653898	3283837	362885	2421311	64344	2720597	84033	606347	110641	48641	346607	1123348	991809	16956090	46354	347592
Sample49	QCinst9.d	2023-09-27 16:43:00			106741	46039421	152158	32651	2284621	12696268	1534604	591255	1287911	3438673	65322	48758540	6869959	2145031	2092484	1294640	10779839	3815131	12384270	115110	738369	73918	8626329	447076	3397455	711656	29046	871796	0	296791	18028503	0	22582
Sample49	QCinst10.d	2023-09-27 21:33:10			110079	4.66005e+07	112116	29419.1	2.16762e+06	1.27036e+07	1.42811e+06	525136	1.21624e+06	2.81169e+06	70701	4.79645e+07	6.74232e+06	2.07539e+06	2.19833e+06	921256	1.10828e+07	3.6803e+06	1.05523e+07	146571	648091	59914.9	8.06615e+06	384594	3.15329e+06	816298	23815.5	863172	33628.7	298052	2.2619e+07	0	6877.49
Sample46	P2A1.d	2023-09-27 22:44:57	QC1		216322	8.60438e+07	336359	76801.9	5.4241e+06	1.18626e+07	3.67749e+06	1.18221e+06	2.72159e+06	8.3946e+06	491881	8.93567e+06	1.41403e+07	6.51621e+06	5.65327e+06	2.49385e+06	2.64318e+07	1.06091e+07	858049	246713	2.15918e+06	289257	768194	68803	575565	136385	121241	321924	874035	626144	8.66553e+06	113522	707682
Sample48	P2A3.d	2023-09-27 23:57:05	S071	Control	219360	5.96983e+07	277513	48117	4.87347e+06	1.49595e+07	3.45412e+06	1.46097e+06	2.76306e+06	2.84397e+06	148319	2.4943e+06	1.42133e+07	2.23529e+06	5.06764e+06	2.5601e+06	1.83262e+07	8.96508e+06	465076	312864	2.15995e+06	10264.7	239527	8120.55	65559.4	20081.6	97571.4	61560.5	404593	104242	4.14462e+06	34716	684074
Sample49	P2A4.d	2023-09-28 01:09:22	S072	MCI	186759	7.43872e+07	254063	58639.2	4.67214e+06	1.06608e+07	3.64201e+06	1.25853e+06	2.83933e+06	3.69721e+06	265368	4.14107e+06	1.39039e+07	2.90479e+06	4.57414e+06	2.45945e+06	2.34372e+07	7.84486e+06	522168	268363	1.92171e+06	30692.5	403142	19449.4	142343	33630.1	81235	140465	800835	443461	6.1732e+06	57578	729670
Sample50	P2A5.d	2023-09-28 02:21:40	S073	AD	147696	8.84538e+07	243382	85710.4	4.1194e+06	7.4568e+06	4.47199e+06	1.00816e+06	2.0705e+06	5.37249e+06	564016	1.4823e+07	1.29166e+07	5.54708e+06	4.23532e+06	1.93555e+06	2.60442e+07	8.89473e+06	2.51269e+06	266002	1.66348e+06	89734.5	2.21901e+06	143421	1.35188e+06	284200	86692	688390	763783	1.1402e+06	1.92575e+07	136347	566008
Sample51	P2A6.d	2023-09-28 03:33:57	S074	AD	175381	8.38259e+07	229329	86038.2	4.12069e+06	1.35314e+07	4.76941e+06	1.07671e+06	2.46679e+06	4.45241e+06	382466	9.46599e+06	1.24181e+07	3.63712e+06	4.09711e+06	2.02199e+06	3.11647e+07	7.98032e+06	1.55808e+06	239563	1.5594e+06	76892.7	1.2753e+06	54441	502311	124051	56512.4	401658	2.03528e+06	624883	1.43328e+07	150422	1.5726e+06
Sample52	P2A7.d	2023-09-28 04:46:14	S075	Control	190079	1.07151e+08	290407	95702.3	4.62916e+06	1.88042e+07	7.84244e+06	1.16362e+06	2.45934e+06	4.9949e+06	466898	1.29388e+07	1.40467e+07	3.41735e+06	5.48438e+06	2.23335e+06	4.12549e+07	8.94121e+06	1.10736e+06	279893	1.77755e+06	85455.4	1.15162e+06	58797.4	574157	123427	61849.5	441971	1.66858e+06	485278	1.14577e+07	184133	1.01387e+06
Sample53	P2A8.d	2023-09-28 05:58:31	S076	AD	105108	6.93865e+07	239781	45292.3	4.15737e+06	1.5854e+07	4.95996e+06	1.11306e+06	2.03412e+06	9.14538e+06	146729	3.55637e+06	1.27372e+07	6.94204e+06	4.47483e+06	2.03755e+06	2.53405e+07	8.69733e+06	701513	289702	1.72893e+06	48984.1	356053	8841.21	108664	31889.7	40954.5	141547	1.4857e+06	147838	5.54614e+06	96896.6	2.4471e+06
Sample54	P2A9.d	2023-09-28 07:10:50	S077	AD	154717	1.17356e+08	240618	124889	4.61879e+06	2.79647e+07	1.12424e+07	1.16556e+06	2.33281e+06	8.02787e+06	753782	1.78436e+07	1.51447e+07	6.67403e+06	6.30465e+06	2.62177e+06	4.8371e+07	1.0234e+07	2.11722e+06	329253	1.79715e+06	178739	2.70203e+06	194617	1.5673e+06	254272	44149.8	231910	3.49604e+06	1.10131e+06	7.09116e+06	160943	1.25547e+06
Sample55	P2A10.d	2023-09-28 08:23:07	S078	AD	143535	9.94428e+07	214752	107536	4.077e+06	2.65515e+07	7.40975e+06	1.15258e+06	1.99563e+06	5.61959e+06	438186	2.19045e+07	1.11427e+07	5.17011e+06	4.82037e+06	2.00595e+06	3.43026e+07	8.56061e+06	3.53512e+06	248111	1.43939e+06	120704	3.33375e+06	200300	1.51456e+06	181961	33652.4	296016	2.92134e+06	1.17635e+06	1.63954e+07	88165.7	736388
Sample56	P2A11.d	2023-09-28 09:35:24	S079	AD	170627	7.01358e+07	239669	39327.8	4.15921e+06	1.25162e+07	5.27427e+06	1.05435e+06	2.00861e+06	1.48612e+06	132832	7.28553e+06	1.17664e+07	916153	4.5874e+06	1.9555e+06	2.35637e+07	7.31739e+06	1.31965e+06	246219	1.16331e+06	53041	811738	30085.6	251571	67524.8	25760.6	422706	832467	187449	9.49696e+06	0	809959
Sample57	P2A12.d	2023-09-28 10:47:41	S080	Control	261493	7.30956e+07	304739	62292	5.37702e+06	1.28926e+07	5.83907e+06	1.37827e+06	3.25263e+06	6.72881e+06	336330	2.45985e+07	1.74502e+07	6.18138e+06	6.3425e+06	2.56368e+06	3.01594e+07	1.10549e+07	2.73568e+06	362763	1.93181e+06	83146.9	2.6081e+06	112354	953131	182969	37475.2	410433	1.24545e+06	1.12404e+06	2.24922e+07	105833	510713
Sample57	QCinst11.d	2023-09-28 15:36:55			131667	4.86056e+07	135638	39138	2.39287e+06	1.37922e+07	1.7038e+06	665660	1.32232e+06	3.04495e+06	49018.7	5.10988e+07	7.11983e+06	1.88702e+06	2.30146e+06	1.12248e+06	1.07327e+07	3.89846e+06	1.09266e+07	133376	709429	77355.3	8.94295e+06	377087	3.44838e+06	774161	28358.4	905062	31425.1	270008	2.19279e+07	0	14126.9
Sample58	P2B1.d	2023-09-28 16:48:41	QC1		250924	9.38945e+07	298775	102092	5.18762e+06	2.76954e+07	8.25016e+06	1.28646e+06	3.14939e+06	8.77786e+06	417061	1.26095e+07	1.46606e+07	6.92425e+06	5.50163e+06	2.61786e+06	3.8708e+07	8.61105e+06	1.53833e+06	238472	1.75048e+06	375587	1.19153e+06	91545.4	847359	174394	33099.1	546980	867502	368040	1.08743e+07	145824	560592
Sample60	P2B3.d	2023-09-28 18:00:49	S081	Control	154138	5.6619e+07	241862	50818.2	4.31252e+06	1.42038e+07	4.5356e+06	1.30064e+06	1.9345e+06	6.28149e+06	90712	7.87133e+06	1.31538e+07	4.82017e+06	4.39546e+06	1.997e+06	2.27078e+07	8.03574e+06	1.49944e+06	190656	1.4832e+06	37487.8	739644	23470	200658	34691.9	25513	292378	1.73439e+06	258095	4.32215e+06	48926	997960
Sample61	P2B4.d	2023-09-28 19:13:06	S082	MCI	179521	8.64065e+07	249147	73448.5	4.64532e+06	1.43597e+07	8.15087e+06	1.33639e+06	2.28689e+06	3.1021e+06	144747	1.73064e+07	1.28941e+07	2.53828e+06	4.35804e+06	1.9222e+06	3.36101e+07	8.34866e+06	2.91416e+06	281830	1.4938e+06	36601	1.87491e+06	45394.3	421480	57831.1	22872.6	61314.5	1.15806e+06	479192	1.2074e+07	24311	1.19521e+06
Sample62	P2B5.d	2023-09-29 12:57:02	S083	AD	169402	1.11826e+08	201009	0	5.05058e+06	7.88668e+06	1.95496e+06	1.1826e+06	2.70362e+06	2.5625e+06	692913	1.15076e+07	1.53897e+07	2.18155e+06	5.45863e+06	2.22259e+06	1.34753e+07	9.64466e+06	1.67118e+06	308806	1.84512e+06	85553.3	2.07189e+06	225287	1.71914e+06	289493	40429.2	1.5493e+06	1.18075e+06	526260	9.34691e+06	86389.7	365761
Sample63	P2B6.d	2023-09-29 14:09:19	S084	MCI	241564	5.52539e+07	255072	40753.4	4.68409e+06	1.38663e+07	4.23812e+06	1.35929e+06	2.66519e+06	6.33217e+06	58736.2	6.55632e+06	1.30382e+07	3.94873e+06	4.38228e+06	2.02128e+06	2.11683e+07	8.52184e+06	1.97602e+06	267308	1.72185e+06	31525.1	542755	18744.5	174355	34298.9	33041.9	128936	923271	145178	4.60518e+06	47418	425349
Sample64	P2B7.d	2023-09-29 15:21:36	S085	AD	198568	9.59811e+07	279215	81780.8	4.65654e+06	2.50261e+07	8.70603e+06	1.17672e+06	2.29578e+06	9.50505e+06	389155	7.83998e+06	1.34756e+07	6.56055e+06	4.59601e+06	2.08389e+06	4.43143e+07	8.62667e+06	1.06531e+06	248428	1.44549e+06	86349.7	890377	37005.4	405001	87241.1	26484.4	125611	1.99262e+06	303450	1.25588e+07	95668.2	1.57577e+06
Sample65	P2B8.d	2023-09-29 16:33:53	S086	AD	217984	1.06282e+08	251086	110033	5.1505e+06	1.6276e+07	6.98906e+06	1.42003e+06	2.99423e+06	8.15767e+06	431901	8.26852e+06	1.40919e+07	6.49382e+06	5.32975e+06	2.341e+06	4.1232e+07	9.93715e+06	1.35008e+06	369919	2.02468e+06	56258	993868	60543.1	400920	80072.5	37275.4	225657	840152	349704	9.31673e+06	141571	332508
Sample66	P2B9.d	2023-09-29 17:46:10	S087	Control	204179	6.94126e+07	253153	49202.1	4.59132e+06	6.20387e+06	4.76554e+06	1.4096e+06	2.38734e+06	7.57056e+06	174975	6.48718e+06	1.32938e+07	6.11762e+06	4.70907e+06	2.17762e+06	2.64297e+07	9.39322e+06	797414	246902	1.80929e+06	21296.1	466990	18865.8	131758	44041.9	39128.6	93068.7	512359	284406	5.61681e+06	53824.7	349529
Sample67	P2B10.d	2023-09-29 18:58:27	S088	MCI	243492	9.9084e+07	323808	92761.5	5.38529e+06	1.98601e+07	7.22304e+06	1.33179e+06	3.00398e+06	1.00285e+07	335806	6.66763e+06	1.53169e+07	7.13936e+06	5.41922e+06	2.68765e+06	3.8113e+07	1.19205e+07	1.0447e+06	331182	1.57821e+06	50226.4	741644	45774.6	298108	64646.8	34937.9	168940	1.17809e+06	247378	9.42089e+06	123607	583906
Sample68	P2B11.d	2023-09-29 20:10:45	S089	Control	232316	9.78753e+07	289211	94981.2	5.24536e+06	1.95003e+07	9.40548e+06	1.25518e+06	2.74624e+06	1.14312e+07	380439	1.07959e+07	1.37448e+07	8.16384e+06	5.68681e+06	2.42646e+06	5.40461e+07	1.04855e+07	1.01457e+06	308204	2.05575e+06	105522	681773	36367.5	289635	51512.2	40424	97300	1.78815e+06	457771	9.56121e+06	234964	1.25557e+06
Sample69	P2B12.d	2023-09-29 21:23:03	S090	AD	269240	7.1092e+07	297503	76860.4	4.94222e+06	7.08407e+06	2.58822e+06	1.13743e+06	2.5581e+06	5.45e+06	368933	1.51521e+07	1.39162e+07	3.81474e+06	5.14693e+06	2.16686e+06	1.9907e+07	1.13393e+07	1.42376e+06	232425	1.64919e+06	69772.6	1.27349e+06	72860.3	743084	178198	29429.5	327123	876999	731383	1.60346e+07	111011	444503
Sample69	QCinst12.d	2023-09-30 02:12:18			181790	6.14448e+07	180261	43264.8	3.14354e+06	1.84807e+07	2.04037e+06	740984	1.46266e+06	3.8894e+06	114440	6.44199e+07	1.01064e+07	2.696e+06	3.04196e+06	1.38827e+06	1.4502e+07	5.27832e+06	1.39135e+07	162291	959635	76634	9.28226e+06	470225	3.88056e+06	922415	31203.3	882636	28741.2	317798	2.39435e+07	0	38634.9
Sample70	P2C1.d	2023-09-30 03:24:06	QC1		269702	1.12768e+08	401326	150419	6.1902e+06	2.08056e+07	5.69974e+06	1.57152e+06	3.52544e+06	1.25068e+07	708799	1.23576e+07	1.92184e+07	7.85073e+06	6.21204e+06	2.63615e+06	4.21132e+07	1.0289e+07	1.29465e+06	298330	3.07009e+06	392319	1.29004e+06	84334.4	910877	177076	156661	322825	908822	312616	8.99067e+06	201360	334454
Sample72	P2C3.d	2023-09-30 04:36:15	S091	Control	215982	1.08062e+08	276178	108804	5.41093e+06	2.85214e+07	7.95031e+06	1.16246e+06	2.98489e+06	6.10244e+06	339700	1.93908e+07	1.49798e+07	3.37367e+06	4.91991e+06	2.54275e+06	3.5676e+07	1.10856e+07	3.20246e+06	338703	2.10951e+06	138869	2.08808e+06	85561.9	842802	196887	134309	161345	1.88441e+06	440408	2.14623e+07	174348	933945
Sample73	P2C4.d	2023-09-30 05:48:32	S092	Control	216107	7.23458e+07	316852	49234.8	5.67623e+06	1.57915e+07	4.44909e+06	1.36331e+06	3.09847e+06	892425	148941	9.97224e+06	1.70738e+07	374568	5.0592e+06	2.54672e+06	2.06892e+07	1.05436e+07	2.01942e+06	287389	2.47627e+06	73789.4	1.2794e+06	36561.7	319627	56662	108965	283653	826688	209659	5.82762e+06	89460.8	497743
Sample74	P2C5.d	2023-09-30 07:00:49	S093	MCI	170998	1.27371e+08	300388	134310	4.94548e+06	2.90508e+07	7.11247e+06	1.35561e+06	2.87421e+06	1.03752e+07	666084	2.73735e+07	1.58142e+07	6.73679e+06	4.67224e+06	2.3054e+06	3.52747e+07	8.88575e+06	5.5192e+06	269338	2.09883e+06	178991	4.1806e+06	242983	2.06538e+06	359758	87107.8	232606	3.136e+06	864672	2.53476e+07	131941	860651
Sample75	P2C6.d	2023-09-30 08:13:07	S094	AD	173583	1.02057e+08	245550	92399.7	4.80158e+06	2.78437e+07	8.65661e+06	1.1802e+06	2.56792e+06	8.59555e+06	325730	2.0103e+07	1.455e+07	5.4743e+06	4.92387e+06	1.99753e+06	3.69563e+07	8.78424e+06	2.29217e+06	259283	1.60809e+06	125111	1.94543e+06	72747.2	691662	117938	58183.3	180652	1.51108e+06	310982	1.32259e+07	106458	488189
Sample76	P2C7.d	2023-09-30 09:25:23	S095	Control	181542	1.73747e+08	288944	295593	5.27876e+06	3.96562e+07	2.63729e+07	1.35355e+06	3.11299e+06	2.18151e+07	713807	2.52511e+07	1.57261e+07	1.55612e+07	5.45333e+06	2.22845e+06	8.98617e+07	1.05415e+07	2.8548e+06	240684	1.83693e+06	103214	1.40282e+06	58018.6	626085	180224	58722.1	468022	3.13361e+06	555274	1.25121e+07	276887	7.18906e+06
Sample77	P2C8.d	2023-09-30 10:37:41	S096	Control	165411	1.04741e+08	277555	81849.2	4.78719e+06	3.69428e+07	1.22078e+07	1.24933e+06	2.8408e+06	1.28143e+07	234673	1.11095e+07	1.4202e+07	8.12791e+06	5.10173e+06	2.07539e+06	4.9911e+07	1.05755e+07	1.30319e+06	330443	1.65311e+06	109351	764395	33665.9	302575	66075.4	48813.6	559763	1.52596e+06	212883	9.25997e+06	149472	1.71391e+06
Sample78	P2C9.d	2023-09-30 11:49:58	S097	AD	179978	1.05584e+08	251583	122171	4.9414e+06	2.17375e+07	8.32812e+06	1.39557e+06	2.57837e+06	6.22331e+06	464426	1.3007e+07	1.41202e+07	3.67083e+06	5.15595e+06	2.33934e+06	4.201e+07	1.08153e+07	1.88182e+06	261129	1.87165e+06	96963.7	1.55145e+06	90159	593871	74399.5	62394.3	223700	2.83794e+06	457677	1.2005e+07	230602	884434
Sample79	P2C10.d	2023-09-30 13:02:16	S098	MCI	171579	1.2951e+08	347472	114005	6.05299e+06	2.83458e+07	9.70816e+06	1.31622e+06	3.35312e+06	9.11342e+06	585615	1.93388e+07	1.80717e+07	5.96012e+06	5.79781e+06	2.52494e+06	4.36338e+07	1.09047e+07	3.9485e+06	285348	1.85037e+06	93252.2	1.92584e+06	108212	950261	167913	42366.7	892371	1.01032e+06	341744	8.10319e+06	145608	330142
Sample80	P2C11.d	2023-09-30 14:14:33	S099	Control	216856	8.85342e+07	310483	86092.5	5.6776e+06	2.73418e+07	6.62173e+06	1.37342e+06	3.29607e+06	4.34949e+06	319170	1.87662e+07	1.71684e+07	2.27872e+06	5.46942e+06	2.37372e+06	3.36101e+07	1.20845e+07	2.6797e+06	294982	1.8458e+06	90634.7	1.81365e+06	65378.4	582058	126165	40962	195265	1.3708e+06	412562	1.32032e+07	63674	508135
Sample81	P2C12.d	2023-09-30 15:26:51	S100	AD	163449	1.00555e+08	263327	121028	4.6934e+06	9.70882e+06	4.16219e+06	1.16902e+06	2.506e+06	6.22011e+06	564287	3.09928e+06	1.43395e+07	4.55341e+06	4.44047e+06	2.3222e+06	3.28436e+07	9.82133e+06	614839	293676	1.52351e+06	57856.3	421320	22620	249707	49733.1	33007.1	93984.4	2.43359e+06	410275	4.97365e+06	176885	2.04051e+06
Sample81	QCinst13.d	2023-09-30 21:28:47			144781	6.08763e+07	164135	46098.9	3.07815e+06	1.71915e+07	1.68088e+06	728682	1.7913e+06	3.9104e+06	51097.4	6.20527e+07	9.43226e+06	2.26615e+06	3.1204e+06	1.23535e+06	1.40779e+07	5.1567e+06	1.44345e+07	149371	888717	64512.8	9.95434e+06	470414	3.57511e+06	640677	32391.3	900193	45637	260378	2.2197e+07	0	10097.8
Sample82	P2D1.d	2023-09-30 22:40:33	QC1		288722	9.49067e+07	419841	142103	7.20165e+06	8.36521e+06	4.09212e+06	2.02522e+06	4.21457e+06	1.1509e+07	536817	1.24975e+07	2.10362e+07	1.03106e+07	6.87806e+06	3.25932e+06	3.98907e+07	1.3736e+07	1.09452e+06	378651	2.13093e+06	435227	1.14578e+06	97271	978109	196642	40354.7	427207	777335	521122	6.14263e+06	213569	469123
Sample84	P2D3.d	2023-09-30 23:52:43	S101	AD	189563	1.1635e+08	314591	146052	5.30825e+06	8.55868e+06	4.6535e+06	1.22256e+06	3.10942e+06	1.34931e+07	763867	5.94291e+06	1.58454e+07	1.14491e+07	5.32058e+06	2.54729e+06	3.55092e+07	1.02787e+07	923196	313197	1.9013e+06	97391.6	676806	41557	403817	94071	49752.6	198135	2.8381e+06	549952	5.85843e+06	311296	3.04191e+06
Sample85	P2D4.d	2023-10-01 01:05:00	S102	Control	189968	1.05544e+08	331659	105884	5.2957e+06	9.93448e+06	4.91807e+06	1.18317e+06	2.88836e+06	6.56147e+06	610872	1.67235e+07	1.63313e+07	4.68779e+06	5.94312e+06	2.31754e+06	3.78449e+07	1.13829e+07	1.51607e+06	240763	2.05159e+06	76732.8	1.06315e+06	42676	379711	67495.5	33304.4	132810	1.24855e+06	872696	1.6616e+07	114426	1.09633e+06
Sample86	P2D5.d	2023-10-01 02:17:17	S103	Control	204713	8.32754e+07	282375	74068.4	4.60154e+06	1.64842e+07	4.71569e+06	1.26424e+06	2.90605e+06	4.11967e+06	381390	7.52429e+06	1.48324e+07	2.34316e+06	5.10909e+06	2.09137e+06	3.88772e+07	1.13592e+07	746247	286312	1.51578e+06	32871.1	562435	20034.7	198744	29409.3	29218.3	46069.9	409911	406612	5.96122e+06	66626	150183
Sample87	P2D6.d	2023-10-01 03:29:34	S104	Control	171219	7.9361e+07	275652	85865.8	4.72512e+06	6.16446e+06	4.66217e+06	1.15195e+06	2.14635e+06	4.23951e+06	399990	1.07117e+07	1.42829e+07	3.27207e+06	4.42221e+06	2.18009e+06	3.49057e+07	9.4769e+06	1.25094e+06	211359	1.48627e+06	59240.5	835441	45155.3	390486	79500.7	28902.9	98817.8	706033	703764	1.21712e+07	98021.8	435696
Sample88	P2D7.d	2023-10-01 04:41:52	S105	Control	110102	1.02589e+08	258449	115675	4.84466e+06	9.0039e+06	6.09012e+06	1.41275e+06	2.69031e+06	4.7061e+06	343876	1.22537e+07	1.41301e+07	2.546e+06	4.6834e+06	2.17557e+06	4.37223e+07	8.174e+06	908268	240314	1.596e+06	28782.4	456283	10393.5	166030	43684.2	25961.2	35565.9	187852	152089	6.69339e+06	21524.8	256472
Sample89	P2D8.d	2023-10-01 05:54:09	S106	AD	163036	8.62305e+07	259385	89064.4	4.61001e+06	1.55554e+07	6.06901e+06	1.09497e+06	2.50526e+06	1.5933e+07	445640	1.67342e+06	1.46427e+07	1.16672e+07	4.97032e+06	2.12104e+06	4.20402e+07	1.07516e+07	335742	239794	1.71064e+06	57872.2	195047	13838.8	105863	19714.6	31426.9	84740.4	2.0764e+06	133766	1.57858e+06	129953	2.26764e+06
Sample90	P2D9.d	2023-10-01 07:06:27	S107	Control	211435	1.15742e+08	317876	132490	5.50133e+06	1.57508e+07	7.27032e+06	1.3699e+06	3.4009e+06	9.12118e+06	604595	1.15005e+07	1.91469e+07	8.08141e+06	6.23842e+06	2.55906e+06	5.31526e+07	1.20599e+07	1.87026e+06	291559	1.91613e+06	93083	1.94131e+06	95127.7	693605	89744	33707.5	684548	2.21279e+06	1.47443e+06	1.22975e+07	137205	503975
Sample91	P2D10.d	2023-10-01 08:18:44	S108	Control	265549	1.14371e+08	435186	141250	7.89523e+06	2.09142e+07	7.40011e+06	2.07683e+06	4.2961e+06	1.39145e+07	463954	4.7132e+06	2.33752e+07	8.42153e+06	7.43175e+06	3.60213e+06	4.79661e+07	1.61246e+07	744654	355646	2.41987e+06	53474.4	399580	27995.9	186872	54696	43738.6	83136.9	1.44729e+06	299766	6.98423e+06	154552	1.48158e+06
Sample92	P2D11.d	2023-10-01 09:31:03	S109	MCI	208397	7.02837e+07	456910	73075.3	7.75207e+06	1.13913e+07	4.8633e+06	2.00723e+06	4.00866e+06	6.80828e+06	344782	1.19005e+07	2.21343e+07	4.46086e+06	7.80582e+06	3.40603e+06	3.25759e+07	1.59377e+07	1.34103e+06	452728	2.51052e+06	64168.1	861183	34267.6	324036	97028.1	40382.3	79703.2	718493	655205	1.304e+07	111786	655427
Sample93	P2D12.d	2023-10-01 10:43:22	S110	AD	202909	1.16769e+08	377417	170847	7.09914e+06	4.50452e+06	3.70731e+06	1.75057e+06	3.28149e+06	4.38322e+06	823393	7.52706e+06	1.88822e+07	3.95962e+06	7.37221e+06	3.4688e+06	2.8499e+07	1.32055e+07	1.10736e+06	355628	2.38821e+06	138538	2.22163e+06	187205	1.2685e+06	148232	39344.5	285188	2.23191e+06	976258	1.36224e+06	211947	367003
Sample93	QCinst14.d	2023-10-01 19:12:09			143883	6.16596e+07	164366	42084.9	3.17015e+06	1.71866e+07	1.71377e+06	869605	1.6493e+06	4.1965e+06	74627.8	5.85486e+07	9.36224e+06	2.27342e+06	2.71075e+06	1.23622e+06	1.37116e+07	5.86407e+06	1.48764e+07	167857	866743	93910.1	1.02323e+07	472949	3.41556e+06	743926	27383	801155	8940.16	295003	1.77331e+07	0	21130.1
Sample94	P2E1.d	2023-10-01 20:24:06	QC1		191161	9.21963e+07	322372	130259	6.44935e+06	1.81725e+07	5.59981e+06	1.66508e+06	3.33942e+06	1.31505e+07	736366	1.3467e+07	1.86552e+07	8.26531e+06	6.46911e+06	2.96366e+06	4.54625e+07	1.26781e+07	1.31043e+06	324565	3.48782e+06	352629	1.17112e+06	88885.8	779247	116712	144067	447645	805390	430988	7.33601e+06	205722	236759
Sample96	P2E3.d	2023-10-01 21:36:16	S111	MCI	194349	1.04671e+08	328551	130484	5.79384e+06	1.43447e+07	7.73241e+06	1.42468e+06	3.56482e+06	4.4456e+06	380147	1.17233e+07	1.80073e+07	2.44696e+06	5.86669e+06	2.30862e+06	3.70572e+07	9.7576e+06	1.46836e+06	340986	2.18259e+06	97737.9	901989	41802.3	487061	96734.7	89264.7	159169	1.13601e+06	248204	8.68805e+06	111982	511595
Sample97	P2E4.d	2023-10-01 22:48:34	S112	MCI	136924	5.40173e+07	168819	51864.4	3.38742e+06	5.15197e+06	2.15701e+06	898007	1.85794e+06	2.35651e+06	163733	6.09312e+06	1.00578e+07	1.64564e+06	2.88828e+06	1.56137e+06	1.50879e+07	7.02834e+06	771236	271989	1.97861e+06	128197	770505	38905	320262	40689.5	77069.2	167055	1.13109e+06	279049	4.65215e+06	210502	223554
Sample98	P2E5.d	2023-10-02 00:00:52	S113	AD	179040	1.01373e+08	247009	104499	5.14992e+06	2.25486e+07	6.04689e+06	1.39126e+06	3.01589e+06	5.36969e+06	346022	7.07733e+06	1.52551e+07	3.99103e+06	5.73692e+06	2.34204e+06	3.82144e+07	1.04757e+07	1.10898e+06	273995	1.84329e+06	59925.3	781430	35611.1	257035	35594.8	77174.2	171588	1.28742e+06	331387	7.23151e+06	71763.7	535336
Sample99	P2E6.d	2023-10-02 01:13:10	S114	AD	159510	7.52904e+07	266390	64049.7	5.08781e+06	1.29414e+07	5.42054e+06	1.23229e+06	2.93568e+06	1.17887e+07	226684	5.27911e+06	1.53149e+07	8.84999e+06	5.04365e+06	2.27967e+06	3.55806e+07	9.7894e+06	585328	256434	1.81693e+06	90857.7	413956	39231.4	243845	38235.9	42722.5	216961	958718	102737	4.72114e+06	79000	491914
Sample100	P2E7.d	2023-10-02 02:25:27	S115	AD	158494	1.00749e+08	275045	111939	4.90238e+06	2.52385e+07	8.50146e+06	1.31802e+06	2.70509e+06	4.62273e+06	342442	1.30559e+07	1.44811e+07	2.27852e+06	4.5621e+06	2.14208e+06	3.76263e+07	8.08596e+06	1.04517e+06	282354	1.30191e+06	49040.6	720377	27928.2	286766	35187.7	36687.6	50628.8	831289	134713	7.4729e+06	124439	340212
Sample101	P2E8.d	2023-10-02 03:37:45	S116	Control	130880	1.31708e+08	264539	169533	4.73747e+06	2.39911e+07	5.0622e+06	1.22492e+06	2.63888e+06	7.24996e+06	694586	1.95429e+07	1.44157e+07	5.39908e+06	4.79568e+06	2.08311e+06	2.84475e+07	9.90351e+06	2.39056e+06	282900	1.55092e+06	129043	2.58387e+06	229103	1.69367e+06	188277	47507	141474	902108	508293	8.57096e+06	72902.3	225600
Sample102	P2E9.d	2023-10-02 04:50:02	S117	Control	120536	8.22088e+07	180877	75283.2	3.12369e+06	1.92943e+07	7.51526e+06	1.02082e+06	2.01082e+06	7.99304e+06	179474	6.58577e+06	9.87117e+06	6.32654e+06	3.08663e+06	1.57686e+06	3.14216e+07	6.48329e+06	992998	218112	1.42621e+06	59517.7	967919	36811.4	266678	34336.7	42548.6	192453	1.4397e+06	194293	7.31376e+06	113184	420911
Sample103	P2E10.d	2023-10-02 06:02:19	S118	MCI	222528	9.62984e+07	294135	99062.6	5.08997e+06	3.48324e+07	9.0244e+06	1.36461e+06	3.03644e+06	4.14033e+06	179989	5.14615e+06	1.56804e+07	2.33663e+06	4.91614e+06	2.21863e+06	3.89389e+07	9.42356e+06	1.03458e+06	288029	1.55946e+06	57276.2	624226	14324.5	162363	25071	45860.3	121843	1.51413e+06	172191	7.23666e+06	77119.9	974134
Sample104	P2E11.d	2023-10-02 07:14:36	S119	Control	242379	1.0112e+08	356425	122936	6.25038e+06	2.77798e+07	1.10987e+07	1.67524e+06	3.58582e+06	8.40276e+06	359471	9.51172e+06	1.97822e+07	5.11963e+06	6.7024e+06	2.97536e+06	4.71933e+07	1.20344e+07	1.2868e+06	333282	2.01287e+06	64735.7	944401	40799.2	334075	57285.1	54327.4	98090.3	1.83942e+06	295811	7.80509e+06	137514	856365
Sample105	P2E12.d	2023-10-02 08:26:53	S120	Control	242227	8.15848e+07	275605	88050.3	4.72649e+06	1.4776e+07	5.99697e+06	1.1454e+06	2.88469e+06	4.13113e+06	302344	5.76809e+06	1.36809e+07	2.02771e+06	4.60177e+06	2.08295e+06	2.7055e+07	8.88339e+06	766305	248756	1.27508e+06	41343.7	507736	14497	172564	29456.9	30225.5	231293	732581	157810	7.03711e+06	48054.1	736438
Sample105	QCinst15.d	2023-10-03 20:25:20			75303.8	4.26638e+07	81019	25892.5	1.57815e+06	9.89385e+06	951810	525651	813451	2.37997e+06	0	3.86065e+07	4.97144e+06	1.1873e+06	1.83285e+06	666798	9.5639e+06	3.39696e+06	8.7457e+06	94188.4	551843	46138.1	5.15417e+06	226309	2.1679e+06	495762	21000.6	8479.98	8509.72	281170	1.74311e+07	0	2724.99
Sample106	P2F1.d	2023-10-03 23:38:58	QC1		258440	6.31054e+07	439616	91736.6	7.16955e+06	5.26739e+06	2.83713e+06	2.02385e+06	4.71102e+06	8.1086e+06	9677.81	8.90878e+06	2.16949e+07	6.38107e+06	7.84024e+06	3.78722e+06	2.38388e+07	1.40932e+07	904688	464410	2.18969e+06	303871	825756	71354.9	690572	146410	56656.7	379308	497201	373591	4.4872e+06	109851	342789
Sample108	P2F3.d	2023-10-04 00:51:07	S121	Control	183727	5.84467e+07	240241	80892.6	4.47863e+06	2.74588e+06	2.49367e+06	998654	2.07048e+06	6.40582e+06	584690	2.42257e+07	1.14271e+07	7.0543e+06	3.82986e+06	1.70228e+06	1.9411e+07	8.38127e+06	2.74821e+06	203237	1.41475e+06	194519	4.54056e+06	433287	2.86023e+06	299751	65462.9	834526	3.88933e+06	2.49264e+06	1.55582e+07	306507	746255
Sample109	P2F4.d	2023-10-04 02:03:24	S122	Control	176036	6.72773e+07	350919	85163	5.71093e+06	9.63392e+06	4.10801e+06	1.67532e+06	3.29825e+06	1.83531e+06	385383	1.04948e+07	1.61141e+07	1.35054e+06	5.11319e+06	2.46056e+06	2.71145e+07	8.79563e+06	1.77912e+06	231673	1.22444e+06	42765.6	1.3568e+06	54821.3	374051	71564.3	31501.1	95079.9	914790	685477	9.61777e+06	69666.8	421473
Sample110	P2F5.d	2023-10-04 03:15:41	S123	Control	234694	6.72224e+07	245542	101520	4.98344e+06	1.20891e+07	3.5877e+06	1.24129e+06	2.62141e+06	5.14383e+06	474160	4.90862e+06	1.32954e+07	3.34474e+06	4.83419e+06	1.85527e+06	2.78782e+07	7.34387e+06	705966	183703	1.04029e+06	66664.6	382020	25955.5	207620	62497.1	29753.6	297740	1.47536e+06	349445	5.77155e+06	114550	1.41249e+06
Sample111	P2F6.d	2023-10-04 04:27:59	S124	AD	135887	7.27075e+07	209970	86651.1	3.11312e+06	5.51887e+06	2.29819e+06	919745	1.91622e+06	8.24829e+06	559819	3.18006e+06	1.03646e+07	9.30614e+06	4.28344e+06	1.84926e+06	1.81226e+07	6.71899e+06	629450	268179	1.37159e+06	118240	803206	92061.8	747355	143685	48024.2	269474	1.90241e+06	213198	1.38145e+06	259331	1.08428e+06
Sample112	P2F7.d	2023-10-04 05:40:16	S125	Control	213960	4.51566e+07	294772	48241.6	5.07992e+06	3.25135e+06	2.64646e+06	1.20047e+06	2.69081e+06	1.63999e+06	128636	4.31825e+06	1.43266e+07	1.13168e+06	4.4013e+06	2.19878e+06	1.86794e+07	9.00462e+06	610263	261710	1.25241e+06	25410.6	354251	10017.4	116648	22085.8	28173.8	63823.2	517897	312785	4.19607e+06	34619	313774
Sample113	P2F8.d	2023-10-04 06:52:33	S126	AD	223058	5.4723e+07	304712	76544.8	4.5056e+06	8.59428e+06	3.23528e+06	1.26921e+06	2.8739e+06	3.47658e+06	320725	1.59362e+06	1.33897e+07	2.12012e+06	4.5814e+06	2.16735e+06	2.20356e+07	8.34758e+06	504258	229261	1.23049e+06	25891.9	178781	2992.31	89038.8	15595	32146.2	81251.5	201657	198429	3.75054e+06	99690.2	251385
Sample114	P2F9.d	2023-10-04 08:04:49	S127	Control	193178	3.89675e+07	202588	45684.9	3.1457e+06	4.25271e+06	2.56809e+06	1.06282e+06	1.52038e+06	4.31068e+06	207250	1.73823e+06	9.29697e+06	3.34635e+06	3.17617e+06	1.51942e+06	1.90975e+07	7.17635e+06	201313	201870	1.01333e+06	11207.3	87922.4	4550.1	66507.4	18497.1	26698.3	149308	944011	391594	2.14783e+06	90047.4	1.09775e+06
Sample115	P2F10.d	2023-10-04 09:17:07	S128	AD	201536	8.24649e+07	341303	112625	6.27512e+06	1.35836e+07	6.3944e+06	1.46854e+06	3.29689e+06	8.30207e+06	546390	8.51474e+06	1.68088e+07	5.52985e+06	6.50487e+06	2.76122e+06	3.56762e+07	1.10926e+07	1.0413e+06	351058	1.89164e+06	77052.5	702764	35996.6	345040	80264	42762.7	284734	1.21681e+06	397061	7.16812e+06	142270	610561
Sample116	P2F11.d	2023-10-04 10:29:24	S129	Control	317169	8.40175e+07	409231	120584	6.81353e+06	6.13974e+06	5.20483e+06	2.0303e+06	3.87401e+06	8.28696e+06	694597	5.31105e+06	2.1423e+07	8.38439e+06	7.39159e+06	3.77287e+06	3.85649e+07	1.61476e+07	1.05871e+06	475314	2.47207e+06	91674.4	856056	66628.2	390303	46534.3	45733.6	307279	900851	523987	3.93296e+06	196612	290328
Sample117	P2F12.d	2023-10-04 11:41:41	S130	AD	267021	3.17347e+07	227824	30216.7	3.82843e+06	5.14713e+06	1.86553e+06	917194	1.46564e+06	1.08747e+06	40321.1	4.1454e+06	9.5306e+06	706036	3.26021e+06	1.59696e+06	8.0175e+06	5.58319e+06	667183	227802	940416	2318.89	377102	16000.6	116829	21349.5	33662.4	72473.6	492901	196182	2.78022e+06	24734.9	367859
Sample117	QCinst16.d	2023-10-04 17:43:34			93014	3.84495e+07	106894	24689.5	1.85702e+06	1.2325e+07	1.13332e+06	475521	1.01878e+06	2.80295e+06	41786.8	4.26508e+07	6.26813e+06	1.76816e+06	1.95072e+06	931665	8.91495e+06	3.45235e+06	9.79223e+06	115591	707791	59424.4	7.93761e+06	433449	3.85917e+06	757555	32815.5	921588	33306.1	344351	1.93117e+07	11897.4	11065.3
Sample118	P2G1.d	2023-10-04 18:55:20	QC1		152596	6.97061e+07	527644	67046.5	7.12291e+06	1.25124e+07	3.41268e+06	2.69646e+06	4.84605e+06	4.36235e+06	296788	6.63454e+06	1.98681e+07	2.92628e+06	8.68164e+06	3.95666e+06	2.10596e+07	1.21003e+07	746679	439226	3.53012e+06	177432	597479	59866.6	386079	53981.6	157278	265676	348673	337139	5.27576e+06	102492	235441
Sample120	P2G3.d	2023-10-04 20:07:30	S131	MCI	278817	8.79715e+07	417855	128468	7.2462e+06	2.56818e+07	1.07778e+07	1.76501e+06	3.81573e+06	1.48918e+07	516941	6.13659e+06	1.89042e+07	1.12446e+07	7.0613e+06	3.47013e+06	5.13953e+07	1.22614e+07	1.04711e+06	358111	2.22112e+06	91851.6	672677	20274.2	231708	61565.4	79506.7	288477	1.32899e+06	159516	7.1724e+06	167540	2.14789e+06
Sample121	P2G4.d	2023-10-04 21:19:47	S132	Control	181812	6.29117e+07	229306	72525.9	3.50425e+06	1.1172e+07	6.26458e+06	973635	1.72045e+06	3.80714e+06	412441	1.84162e+07	1.17501e+07	2.76612e+06	4.60172e+06	1.9289e+06	3.57037e+07	8.6261e+06	1.6606e+06	234733	1.461e+06	80740.3	1.53834e+06	62613.9	543456	94086	51967.7	378885	1.78438e+06	619676	1.64043e+07	148283	664762
Sample122	P2G5.d	2023-10-04 22:32:04	S133	AD	182165	8.12455e+07	326808	110463	5.67707e+06	2.2662e+07	6.21725e+06	1.60761e+06	3.05585e+06	5.57102e+06	416935	1.20812e+07	1.54398e+07	4.03163e+06	6.05386e+06	2.81137e+06	3.25923e+07	1.15665e+07	1.4791e+06	361701	2.18459e+06	59025.8	1.26069e+06	47486	371047	71692.8	42020.3	153347	1.23669e+06	326090	1.00706e+07	142998	525380
Sample123	P2G6.d	2023-10-04 23:44:21	S134	AD	159709	8.72283e+07	251214	88448	4.63991e+06	2.71145e+07	8.04408e+06	1.23076e+06	2.54662e+06	1.14216e+07	612343	9.30105e+06	1.25809e+07	8.93114e+06	4.50195e+06	2.36764e+06	4.47545e+07	9.1162e+06	1.33133e+06	242936	1.34006e+06	96879.1	902748	42605.3	379893	79293.8	22696.5	420579	1.72618e+06	310031	1.09218e+07	103877	1.11246e+06
Sample124	P2G7.d	2023-10-05 00:56:39	S135	Control	138781	5.44014e+07	161699	48276	3.50819e+06	1.76468e+07	5.25726e+06	852608	1.93363e+06	2.93299e+06	268362	1.298e+07	9.86836e+06	2.12811e+06	3.27641e+06	1.6625e+06	2.56326e+07	6.49165e+06	1.74978e+06	180472	980424	75889.3	1.52603e+06	67750.7	477744	86508.7	24949.2	97506	1.59051e+06	362530	1.48463e+07	122021	556051
Sample125	P2G8.d	2023-10-05 02:08:56	S136	MCI	239622	7.39172e+07	327062	93960.2	5.66589e+06	1.8563e+07	7.0827e+06	1.44076e+06	2.59559e+06	5.36269e+06	374676	1.2302e+07	1.61504e+07	2.66629e+06	6.49901e+06	2.62409e+06	3.50574e+07	1.16055e+07	2.12449e+06	315229	1.73519e+06	95306.6	1.2457e+06	51713.6	422349	103083	46111.8	154605	928276	391338	1.13525e+07	100015	435424
Sample126	P2G9.d	2023-10-05 03:21:14	S137	AD	204936	6.41968e+07	308662	70855.9	4.69574e+06	1.27612e+07	4.39145e+06	1.5175e+06	2.73221e+06	6.18608e+06	256379	4.473e+06	1.40041e+07	3.41989e+06	4.93214e+06	2.58535e+06	2.80779e+07	1.0369e+07	949726	303430	1.68914e+06	42596.9	696789	26407.4	186290	36188.2	30533.1	93191.8	1.41955e+06	288607	6.36178e+06	126608	782761
Sample127	P2G10.d	2023-10-05 04:33:31	S138	Control	139859	5.68573e+07	182091	62315.5	3.15669e+06	1.03787e+07	2.34523e+06	754855	1.77899e+06	3.55909e+06	293155	3.04714e+06	8.62789e+06	2.59377e+06	3.97776e+06	1.59029e+06	1.4582e+07	5.67476e+06	529914	155507	977703	35951	364292	15741.6	113605	23539.5	22683.7	123332	444028	298574	3.99886e+06	124187	244338
Sample128	P2G11.d	2023-10-05 05:45:49	S139	AD	212967	7.91007e+07	353270	101216	6.0616e+06	1.68761e+07	8.65601e+06	1.54973e+06	3.29629e+06	7.61028e+06	606221	1.40766e+07	1.70353e+07	6.135e+06	6.33146e+06	2.59616e+06	4.66199e+07	1.26314e+07	1.47106e+06	341287	2.12479e+06	62853.4	1.20093e+06	52831.8	557086	92551.2	44845.9	173812	1.37065e+06	399982	1.13989e+07	157680	680198
Sample129	P2G12.d	2023-10-05 06:58:07	S140	Control	210276	7.67216e+07	281859	93334	4.74865e+06	1.68823e+07	4.95224e+06	1.4944e+06	2.43614e+06	3.97732e+06	601879	1.36674e+07	1.34141e+07	2.46367e+06	4.85112e+06	2.27125e+06	3.16725e+07	8.47888e+06	1.91447e+06	238627	1.38713e+06	66241.1	1.4277e+06	75050	594634	143736	26942.5	492136	1.16505e+06	737708	1.53865e+07	106370	781670
Sample129	QCinst17.d	2023-10-05 13:00:04			145176	4.72134e+07	147230	41407.2	2.96394e+06	1.61955e+07	1.46739e+06	691837	1.1658e+06	3.71729e+06	92437.4	5.25673e+07	7.17585e+06	2.08462e+06	2.68946e+06	1.14719e+06	1.29253e+07	4.61814e+06	1.36679e+07	155417	931880	61648.8	9.30784e+06	522971	3.27884e+06	732878	27959.7	730661	31238.8	281212	1.45571e+07	0	7196.69
Sample130	P2H1.d	2023-10-05 14:11:49	QC1		224668	6.9288e+07	485819	97374	6.78507e+06	1.40769e+07	4.44915e+06	1.82107e+06	3.58147e+06	7.39324e+06	506699	9.94445e+06	1.825e+07	4.73032e+06	7.82252e+06	3.36933e+06	2.89761e+07	1.19513e+07	1.03541e+06	371369	2.16263e+06	193877	872867	58207.3	523344	115378	76834.7	244268	490730	468159	1.00348e+07	88717.3	321143
Sample132	P2H3.d	2023-10-05 15:23:59	S141	MCI	190569	6.12233e+07	342295	56652	5.28558e+06	1.89998e+07	4.67619e+06	1.43931e+06	2.67393e+06	7.16242e+06	202406	4.16641e+06	1.42155e+07	5.32069e+06	5.52825e+06	2.4688e+06	2.19948e+07	9.70705e+06	664922	340920	2.2103e+06	23264.7	518586	12430	119766	11808.3	61822.8	186954	1.31823e+06	260410	6.60915e+06	111138	488501
Sample133	P2H4.d	2023-10-05 16:36:16	S142	Control	301005	1.03839e+08	493926	154117	6.76269e+06	2.66515e+07	8.49812e+06	2.21552e+06	3.98662e+06	1.21672e+07	793349	8.56857e+06	2.04437e+07	8.39923e+06	7.37858e+06	3.7867e+06	4.76394e+07	1.26155e+07	1.093e+06	504233	2.99553e+06	77136.3	898689	42746.7	283383	50734.3	64789	265561	1.08366e+06	407426	9.46508e+06	122228	370643
Sample134	P2H5.d	2023-10-05 17:48:33	S143	MCI	177097	1.10096e+08	294052	146403	5.21916e+06	2.84411e+07	8.32778e+06	1.46417e+06	2.79114e+06	6.38243e+06	757279	4.90129e+06	1.59058e+07	4.45362e+06	6.27182e+06	2.69882e+06	4.91829e+07	1.04526e+07	1.1012e+06	311144	1.78749e+06	80172.9	680408	39413.4	322796	70539.8	39487.8	231879	628194	273761	8.68924e+06	138485	332895
Sample135	P2H6.d	2023-10-05 19:00:50	S144	AD	284922	5.15644e+07	384354	43334.9	6.35402e+06	1.24931e+07	3.91904e+06	1.92579e+06	3.7874e+06	2.30056e+06	245401	8.91031e+06	1.83307e+07	1.53093e+06	8.02941e+06	3.42007e+06	2.53645e+07	1.09518e+07	1.44035e+06	390253	2.05013e+06	44126.2	854823	37215.4	261104	36100.5	32709	98274.5	246026	252232	7.59346e+06	30551.5	182089
Sample136	P2H7.d	2023-10-05 20:13:07	S145	MCI	133828	6.94056e+07	185065	67375.2	3.67833e+06	1.98509e+07	6.31976e+06	1.04945e+06	1.98821e+06	9.07433e+06	164933	6.58305e+06	1.10874e+07	7.38762e+06	4.39468e+06	1.86083e+06	2.91466e+07	6.89308e+06	846533	222617	1.1568e+06	55282.4	543129	19555.4	139949	29501.4	31033	206320	1.25654e+06	261114	9.75199e+06	104002	891852
Sample137	P2H8.d	2023-10-05 21:25:25	S146	MCI	225679	8.41503e+07	379456	109456	5.8005e+06	1.79514e+07	8.00261e+06	1.78793e+06	3.00667e+06	6.901e+06	513275	1.00525e+07	1.80446e+07	4.59748e+06	7.20927e+06	3.13392e+06	4.00159e+07	1.38795e+07	1.41879e+06	375690	2.36592e+06	52832.1	953762	39627.6	341604	81289.4	49303.3	85107.8	702164	303709	1.12949e+07	81003.4	322886
Sample138	P2H9.d	2023-10-05 22:37:41	S147	Control	237202	8.59586e+07	341559	111077	6.06591e+06	1.13431e+07	7.09619e+06	1.58452e+06	3.0347e+06	8.88916e+06	1.00022e+06	2.57135e+07	1.71836e+07	7.57685e+06	5.95945e+06	3.06531e+06	4.55247e+07	1.00358e+07	2.87497e+06	312919	1.65757e+06	169440	2.29323e+06	113134	1.10894e+06	299904	32882.1	211102	562080	975315	2.68656e+07	136244	272165
Sample139	P2H10.d	2023-10-05 23:49:58	S148	AD	189465	4.99205e+07	275725	60131.7	5.01282e+06	5.97706e+06	1.79236e+06	1.52407e+06	2.40959e+06	2.23766e+06	230355	7.42673e+06	1.34511e+07	1.66155e+06	4.93895e+06	2.16805e+06	1.1316e+07	5.81633e+06	2.35939e+06	308155	1.45724e+06	48877.5	2.07579e+06	78415.1	530898	69886.8	27845.8	203187	777821	1.02873e+06	1.40796e+07	58603.8	145720
Sample140	P2H11.d	2023-10-06 01:02:14	S149	MCI	187075	6.2298e+07	171234	91633.1	3.35341e+06	1.14334e+07	4.54722e+06	926196	1.85004e+06	3.33202e+06	484602	1.06762e+07	1.0288e+07	2.09162e+06	3.80718e+06	1.57327e+06	2.72203e+07	6.35755e+06	762480	158081	1.21246e+06	57311.3	803112	40270.6	368814	83751.9	30532.6	289650	958294	584992	1.08843e+07	161925	654826
Sample141	P2H12.d	2023-10-06 02:14:32	S150	AD	298394	4.676e+07	354753	46068.3	5.8985e+06	9.01811e+06	2.10274e+06	1.86234e+06	3.74094e+06	2.37132e+06	234705	4.8922e+06	1.53299e+07	1.70107e+06	5.31659e+06	2.7307e+06	1.62181e+07	8.0307e+06	395605	303740	1.60535e+06	12342.8	301604	14400.6	129303	16823.2	24224.7	87631.1	554958	362469	4.97461e+06	37391.3	432363
Sample141	QCinst18.d	2023-10-06 08:16:25			94112.8	3.47882e+07	100846	27079.2	1.72489e+06	1.07906e+07	1.04305e+06	449707	962292	2.25582e+06	51386.5	4.21743e+07	5.21325e+06	1.65467e+06	1.70027e+06	865457	8.88069e+06	3.01896e+06	9.65902e+06	98683.9	764304	62919	8.6014e+06	469223	3.68889e+06	689279	31205.6	835985	30637.2	320985	1.8246e+07	1811.26	20752.5
	QCinst19.d	2023-10-06 14:47:29			105983	3.5809e+07	105623	28773.5	1.88471e+06	1.0739e+07	1.15138e+06	575966	798793	2.68425e+06	43897.8	3.92746e+07	5.82863e+06	1.6333e+06	1.89848e+06	866856	8.46669e+06	2.99579e+06	9.0376e+06	80623.3	555907	54143	6.57192e+06	352321	2.47836e+06	477151	24159.8	909535	29319.8	314620	2.08061e+07	0	10732.5
Sample1	P3A1.d	2023-10-06 15:59:24	QC1		181234	8.3177e+07	286470	117875	5.00555e+06	2.82715e+07	1.00106e+07	1.3384e+06	2.79813e+06	8.4456e+06	351629	2.26805e+07	1.28564e+07	4.57392e+06	4.5835e+06	2.28479e+06	3.56619e+07	7.97354e+06	3.49286e+06	251399	1.84637e+06	388880	1.55257e+06	96030.7	1.36993e+06	437988	129033	452758	754782	308450	1.39523e+07	118947	666559
Sample3	P3A3.d	2023-10-06 17:11:33	S151	Control	155203	7.25046e+07	326722	70732.6	4.95475e+06	2.1364e+07	7.37588e+06	1.4062e+06	2.36853e+06	5.51939e+06	157602	2.63102e+07	1.40972e+07	2.88402e+06	5.33369e+06	2.57889e+06	2.74211e+07	9.26667e+06	4.98035e+06	317611	1.52623e+06	113877	2.91491e+06	101043	956296	207176	79461.9	113942	1.82368e+06	337343	1.39153e+07	83427.1	1.34968e+06
Sample4	P3A4.d	2023-10-06 18:23:50	S152	Control	109750	8.02049e+07	222869	67455.7	4.1864e+06	2.42958e+07	8.26198e+06	1.00983e+06	2.28649e+06	7.41393e+06	196057	7.33787e+06	1.24424e+07	4.54595e+06	4.38013e+06	1.84574e+06	2.98954e+07	6.19236e+06	1.49085e+06	220820	1.35314e+06	72640.9	993744	45414.2	399493	73208.7	50346	254659	1.27629e+06	122812	6.08049e+06	91617	570536
Sample5	P3A5.d	2023-10-06 19:36:06	S153	AD	178059	1.07204e+08	281582	151984	4.95178e+06	4.17312e+07	1.84285e+07	1.49974e+06	2.739e+06	6.85881e+06	356788	6.62046e+06	1.53241e+07	4.17478e+06	4.96443e+06	2.57934e+06	6.00714e+07	9.14992e+06	1.42719e+06	321807	1.65081e+06	62730.2	609414	20540.3	204214	53631.3	60375.3	144679	1.7782e+06	154701	8.17579e+06	186051	5.54566e+06
Sample6	P3A6.d	2023-10-06 20:48:23	S154	AD	173859	3.09388e+07	247739	23044	3.88147e+06	4.9435e+06	5.31601e+06	1.40067e+06	2.29931e+06	1.71437e+06	41455.6	6.17881e+06	1.09408e+07	996244	4.78875e+06	1.98222e+06	1.9128e+07	7.90172e+06	737357	242970	1.27316e+06	5185.85	341296	24976.9	161553	29308.5	54179.9	97704	101825	86780	1.00539e+06	100380	139716
Sample7	P3A7.d	2023-10-06 22:00:40	S155	Control	184101	7.03579e+07	247458	66916.6	4.58413e+06	2.04927e+07	5.15822e+06	1.33948e+06	2.76348e+06	2.18741e+06	107828	8.39506e+06	1.31437e+07	912939	5.26987e+06	2.33693e+06	2.17376e+07	8.02835e+06	3.24283e+06	286968	1.41177e+06	58612.5	1.52551e+06	66319.3	576755	126980	46366.7	181104	776468	144207	1.0165e+07	91379.7	444021
Sample8	P3A8.d	2023-10-06 23:12:56	S156	Control	139705	4.42312e+07	186470	18646.7	3.44146e+06	6.66117e+06	3.88357e+06	833821	1.96911e+06	2.09291e+06	61984.6	7.8288e+06	1.05168e+07	1.05548e+06	3.512e+06	1.70965e+06	1.54501e+07	6.67686e+06	1.10012e+06	222099	1.01628e+06	33670.7	625122	14675.9	156684	39147.8	35148.6	87959.6	654995	146987	4.96089e+06	43377	333570
Sample9	P3A9.d	2023-10-07 00:25:14	S157	MCI	227285	8.78787e+07	307542	81834	5.22643e+06	2.30964e+07	4.76114e+06	1.53112e+06	2.93947e+06	4.7727e+06	361581	3.16976e+07	1.57154e+07	2.4675e+06	5.99889e+06	2.78551e+06	2.15027e+07	1.18257e+07	5.02335e+06	331994	1.90529e+06	48742	3.85656e+06	165063	1.3479e+06	284787	54915.5	330445	184234	381650	9.20571e+06	56106.6	38281.8
Sample10	P3A10.d	2023-10-07 01:37:30	S158	Control	224014	6.53612e+07	230082	79750	4.0199e+06	2.39828e+07	1.18655e+07	1.02119e+06	2.47856e+06	5.08938e+06	46682	2.11839e+07	1.19121e+07	3.07596e+06	4.43745e+06	1.63934e+06	3.90931e+07	6.48745e+06	3.9381e+06	225230	1.23849e+06	38813.5	1.5058e+06	42317.9	701076	195370	35614.2	211234	1.32493e+06	249299	1.68967e+07	79569.2	1.00866e+07
Sample11	P3A11.d	2023-10-07 02:49:47	S159	Control	173987	6.59275e+07	229359	55714.4	4.35206e+06	1.66007e+07	5.46436e+06	1.27191e+06	2.57811e+06	2.64652e+06	100031	9.12614e+06	1.23312e+07	1.42959e+06	5.1332e+06	2.32938e+06	2.03286e+07	8.59763e+06	1.86922e+06	229913	1.19098e+06	41929	981094	25231.1	226178	41157	28117.7	135261	1.52067e+06	113328	4.55093e+06	27805	649510
Sample12	P3A12.d	2023-10-07 04:02:04	S160	MCI	128624	7.53583e+07	189290	73244.7	3.51968e+06	2.30773e+07	9.05217e+06	986241	1.90507e+06	2.39533e+06	230321	1.66233e+07	1.00357e+07	1.61679e+06	4.02298e+06	1.96693e+06	2.98997e+07	6.27537e+06	2.89455e+06	214130	1.23541e+06	94351.5	2.12932e+06	96272.5	942050	216274	33041.9	649673	1.68278e+06	298952	2.22722e+07	60811.9	1.21054e+06
Sample57	QCinst20.d	2023-10-07 10:03:58			90216.7	3.61674e+07	125553	28296.5	1.8998e+06	1.17746e+07	1.28288e+06	605637	969590	3.25817e+06	59237.6	4.65087e+07	6.36148e+06	1.59227e+06	2.1621e+06	1.05116e+06	9.69339e+06	3.60481e+06	1.02654e+07	144598	704267	62861.7	8.23197e+06	426212	2.73592e+06	575595	25135.3	752565	9420.34	223826	1.6167e+07	0	13638.9
Sample58	P3B1.d	2023-10-07 11:15:43	QC1		151475	8.23296e+07	253245	111601	4.22404e+06	1.15908e+07	4.50376e+06	1.08332e+06	2.06726e+06	9.92924e+06	644926	1.26557e+07	1.29053e+07	7.97527e+06	4.4709e+06	1.92571e+06	3.43253e+07	8.04632e+06	1.4408e+06	249643	1.3037e+06	364428	1.27542e+06	102045	920349	206976	25006.1	302659	523586	511516	7.19115e+06	145190	346174
Sample60	P3B3.d	2023-10-07 12:27:52	S161	AD	167856	6.627e+07	200490	64462.7	3.52019e+06	1.62836e+07	6.89562e+06	820653	1.76114e+06	5.53647e+06	159288	1.39396e+07	1.08558e+07	3.40974e+06	4.00473e+06	1.77692e+06	2.9138e+07	6.95731e+06	1.85285e+06	207946	1.18876e+06	84443.2	1.0314e+06	40753.6	564922	170275	25843.7	166086	1.3011e+06	235964	1.00215e+07	91149.5	787291
Sample61	P3B4.d	2023-10-07 13:40:09	S162	Control	168691	1.02869e+08	275851	136496	4.57743e+06	2.8766e+07	8.81324e+06	1.33849e+06	2.59774e+06	6.53502e+06	297903	2.80221e+07	1.3314e+07	3.35965e+06	5.04188e+06	2.5436e+06	3.68746e+07	8.72017e+06	3.73367e+06	263628	1.37371e+06	102971	2.28349e+06	105419	1.13065e+06	284216	27065.1	251640	1.85179e+06	559738	2.31685e+07	118552	1.97581e+06
Sample62	P3B5.d	2023-10-07 14:52:26	S163	AD	142220	9.66689e+07	250268	91656.3	4.30775e+06	2.42195e+07	6.45206e+06	1.13663e+06	2.15205e+06	3.37284e+06	332470	1.48455e+07	1.18907e+07	1.80163e+06	4.77182e+06	1.80594e+06	2.89989e+07	7.50766e+06	1.86184e+06	230187	1.27473e+06	50815.3	1.46616e+06	57695.8	472324	94644.2	30049	260656	1.16691e+06	305736	1.12531e+07	111759	408956
Sample63	P3B6.d	2023-10-07 16:04:44	S164	AD	171742	5.58034e+07	268210	40126.7	4.46536e+06	1.52862e+07	4.26353e+06	1.04142e+06	2.45067e+06	1.48578e+06	68593.8	8.55524e+06	1.28236e+07	686764	4.3294e+06	1.95493e+06	1.8598e+07	9.6961e+06	1.46149e+06	290298	1.46358e+06	12405.3	748143	30956.1	166753	26865.1	22809.5	194806	297666	101842	2.18594e+06	45453	119466
Sample64	P3B7.d	2023-10-07 17:17:01	S165	Control	135436	5.93655e+07	148844	48068.7	3.03985e+06	1.29522e+07	4.95423e+06	666429	1.66209e+06	2.31335e+06	71567.7	6.7094e+06	8.97577e+06	1.18897e+06	3.35073e+06	1.64985e+06	1.81989e+07	6.30637e+06	1.36941e+06	196566	1.09007e+06	97464.8	857059	28503.4	250848	53072.3	20886.3	208236	1.29888e+06	134971	7.45346e+06	51437.7	707154
Sample65	P3B8.d	2023-10-07 18:29:18	S166	MCI	121645	5.54612e+07	178972	41497.8	3.00364e+06	1.51676e+07	6.56487e+06	851607	1.56262e+06	2.1157e+06	112634	1.70999e+07	8.51755e+06	1.08919e+06	3.23167e+06	1.52559e+06	2.52001e+07	6.00183e+06	1.84353e+06	186826	1.20557e+06	44126.9	1.18379e+06	36730	377409	102289	20033.7	77553.7	639097	143958	1.20764e+07	72719.3	405619
Sample66	P3B9.d	2023-10-07 19:41:34	S167	AD	181041	7.07681e+07	266664	61107.7	4.47694e+06	1.63544e+07	7.87154e+06	1.2486e+06	2.41041e+06	4.10485e+06	119287	1.30642e+07	1.31591e+07	1.7109e+06	5.10133e+06	2.04755e+06	2.56867e+07	1.05087e+07	2.79475e+06	247354	1.4686e+06	51708.8	1.71166e+06	60215.8	449389	59351.1	20926.3	282445	893954	443441	5.42566e+06	34159.3	216403
Sample67	P3B10.d	2023-10-07 20:53:51	S168	AD	170880	2.90219e+07	218656	16242	3.88536e+06	7.85228e+06	2.45955e+06	1.20215e+06	1.97051e+06	2.11562e+06	14205.3	5.3713e+06	1.14236e+07	1.0463e+06	3.95089e+06	1.48147e+06	1.08453e+07	7.56464e+06	1.1705e+06	206358	1.25366e+06	13180.6	625744	8878.17	125764	14329.3	21769.9	90932.6	525523	251764	2.39223e+06	10192.1	162234
Sample68	P3B11.d	2023-10-07 22:06:08	S169	Control	200867	5.43321e+07	249192	48216.9	3.8517e+06	1.39239e+07	4.88656e+06	1.0155e+06	2.27392e+06	909929	100512	9.01184e+06	1.24611e+07	423622	4.43406e+06	1.93375e+06	1.92981e+07	6.96117e+06	1.84535e+06	217398	1.09634e+06	22088.2	1.10145e+06	30769.5	295781	65196.8	15980	117813	431054	165667	6.35227e+06	44971.3	178146
Sample69	P3B12.d	2023-10-07 23:18:24	S170	Control	119931	5.57126e+07	167019	39733.1	2.84052e+06	1.2413e+07	4.33983e+06	632346	1.32424e+06	1.01152e+06	104071	7.95668e+06	8.33343e+06	564020	3.35896e+06	1.3548e+06	1.75542e+07	8.06095e+06	918109	190176	1.01637e+06	33916.7	473356	11827.7	149435	42272.8	18018.4	251095	792143	160338	5.89224e+06	66631.3	991612
Sample69	QCinst21.d	2023-10-08 05:20:16			90210.8	3.72892e+07	88447.7	21114.5	1.76914e+06	1.07795e+07	1.17533e+06	622248	1.08349e+06	2.62168e+06	61136.3	4.32994e+07	5.33675e+06	1.58966e+06	1.71552e+06	846539	7.7656e+06	3.29869e+06	9.02938e+06	124615	594779	57008.5	6.80741e+06	359008	2.3677e+06	492106	21718.9	669189	39755.5	219717	1.35644e+07	0	7503.94
Sample70	P3C1.d	2023-10-08 06:32:01	QC1		85179.2	1.51949e+08	278277	449253	4.91495e+06	4.56208e+06	2.51933e+06	1.1962e+06	2.3848e+06	4.17176e+07	1.6593e+06	5.50474e+07	1.45545e+07	2.92814e+07	4.68325e+06	2.30503e+06	2.18648e+07	7.70673e+06	6.24299e+06	275645	2.44586e+06	475456	3.01191e+06	128119	1.88664e+06	469981	185751	476894	79683.2	1.71018e+06	3.13893e+07	131480	86115.2
Sample72	P3C3.d	2023-10-08 07:44:11	S171	Control	112396	9.3772e+07	232734	128043	3.83971e+06	2.49034e+06	825171	1.26012e+06	1.84175e+06	9.35822e+06	414405	2.48756e+07	1.22837e+07	5.46956e+06	4.85086e+06	1.983e+06	1.07373e+07	7.10891e+06	2.31809e+06	183531	1.94939e+06	39430	866776	20869.9	545212	252468	123297	40793.4	41357.6	347727	1.66185e+07	11403.6	83959.3
Sample73	P3C4.d	2023-10-08 08:56:27	S172	AD	103286	1.06843e+08	334493	379542	5.37983e+06	1.97265e+06	1.25506e+06	1.14605e+06	2.42857e+06	4.37519e+07	1.92695e+06	6.90994e+07	1.2939e+07	3.90766e+07	5.90629e+06	2.58894e+06	1.56977e+07	1.24616e+07	7.76681e+06	325169	2.99284e+06	101623	4.92731e+06	290560	3.22355e+06	873681	129562	1.86584e+06	110042	2.35083e+06	1.87322e+07	95640	25705.2
Sample74	P3C5.d	2023-10-08 10:08:44	S173	MCI	112203	1.24266e+08	274172	188443	4.29818e+06	1.84904e+06	651928	1.32797e+06	1.99886e+06	1.73781e+07	731692	1.99946e+07	1.43437e+07	1.41416e+07	5.44352e+06	2.14625e+06	1.01578e+07	8.69882e+06	1.45367e+06	277037	2.03858e+06	19519.2	954864	41943.2	374124	57550.6	81668.8	123988	66124.1	620185	1.77003e+07	45907.7	46560.9
Sample75	P3C6.d	2023-10-08 11:21:01	S174	MCI	146838	1.73367e+08	374035	336824	6.26417e+06	1.18886e+06	751230	1.50792e+06	3.22252e+06	1.89848e+07	2.17043e+06	1.19836e+08	1.96852e+07	1.31072e+07	7.04442e+06	3.25274e+06	1.27065e+07	1.14053e+07	1.62268e+07	382124	3.12893e+06	205059	1.06665e+07	521586	6.54045e+06	2.08012e+06	82723.7	580060	92451.1	3.71645e+06	9.24663e+07	72003.7	54051
Sample76	P3C7.d	2023-10-08 12:33:17	S175	Control	121868	1.13905e+08	304384	150093	5.55361e+06	1.11766e+06	280926	1.36504e+06	2.62531e+06	1.07168e+07	763591	2.79511e+07	1.62382e+07	8.4878e+06	5.51521e+06	2.90683e+06	6.12214e+06	1.0843e+07	3.04243e+06	282309	1.85528e+06	55982.2	1.86339e+06	76743	653459	117050	59873.9	54860.7	25448.6	1.12886e+06	3.25796e+07	39154	20180.8
Sample77	P3C8.d	2023-10-08 13:45:34	S176	AD	123078	1.18074e+08	287509	200391	4.60358e+06	1.18115e+06	506614	1.14102e+06	2.0441e+06	1.40721e+07	1.2146e+06	3.16401e+07	1.29891e+07	1.38595e+07	5.63012e+06	2.40427e+06	8.23111e+06	9.90505e+06	5.36933e+06	290430	1.8173e+06	94211.2	4.25755e+06	145000	1.52901e+06	241229	56395.9	214485	102458	3.64993e+06	4.75208e+07	78937.2	41498.2
Sample78	P3C9.d	2023-10-08 14:57:53	S177	MCI	107198	1.32285e+08	320906	181244	4.82441e+06	1.18075e+06	769253	1.1347e+06	2.11639e+06	1.38711e+07	644040	6.99458e+06	1.45717e+07	1.0582e+07	5.60501e+06	2.18674e+06	8.00196e+06	8.99489e+06	376405	267328	1.82507e+06	44618	170355	6433.53	73269.9	12604.7	61685.9	61949.4	74711.3	491287	1.00506e+07	89664.4	61109.4
Sample79	P3C10.d	2023-10-08 16:10:11	S178	Control	160862	1.57444e+08	315534	249189	5.35224e+06	6.37525e+06	1.39155e+06	1.74683e+06	3.05007e+06	2.6838e+07	551362	1.71418e+07	1.66235e+07	1.83687e+07	6.38773e+06	2.58294e+06	1.71029e+07	1.05931e+07	1.50817e+06	387588	1.89186e+06	23953.4	704053	27583	308063	72066.4	37119.3	136069	204464	635407	2.52722e+07	41581.8	236102
Sample80	P3C11.d	2023-10-08 17:22:27	S179	AD	116749	1.60421e+08	227302	290775	4.12927e+06	1.49576e+06	877885	1.09507e+06	2.30136e+06	1.78653e+07	925341	1.90846e+07	1.3189e+07	1.38309e+07	4.77434e+06	2.23865e+06	1.14727e+07	8.96552e+06	1.75767e+06	879853	1.71972e+06	56739.9	795520	37680.2	432210	128342	30156	97402.7	403619	1.11185e+06	2.83676e+07	45311.6	585415
Sample81	P3C12.d	2023-10-08 18:34:44	S180	Control	151405	1.95154e+08	240682	345994	4.02417e+06	1.65421e+06	1.49599e+06	1.21769e+06	2.33604e+06	1.5294e+07	677823	6.64656e+07	1.26126e+07	1.03244e+07	4.20782e+06	2.13439e+06	1.57168e+07	8.49893e+06	1.03053e+07	227376	1.47165e+06	95492.2	3.55497e+06	185581	3.51165e+06	723577	38156.1	396296	761587	1.53589e+06	8.94374e+07	0	3.72278e+06
Sample81	QCinst22.d	2023-10-09 00:36:37			90004.5	3.71147e+07	111775	26022.4	1.94144e+06	1.08955e+07	1.0896e+06	513159	844565	2.4734e+06	39491.6	3.89769e+07	6.50066e+06	1.4197e+06	1.92183e+06	712827	9.32126e+06	2.94284e+06	9.28148e+06	98441	558278	50879.2	7.36871e+06	365090	2.25985e+06	437893	20040.8	745834	0	242786	1.50933e+07	0	12242.7
Sample82	P3D1.d	2023-10-09 01:48:23	QC1		99961.5	7.77833e+07	193771	88424.4	3.54326e+06	4.63393e+06	3.26712e+06	622648	1.547e+06	1.10665e+07	485756	1.3327e+07	1.02657e+07	7.97454e+06	3.28444e+06	1.53942e+06	2.77065e+07	5.91198e+06	1.28848e+06	177846	891680	442689	1.21259e+06	103140	938000	238380	16581.6	377215	909306	563889	5.87184e+06	181406	326208
Sample84	P3D3.d	2023-10-09 03:00:32	S181	MCI	158342	6.81781e+07	196399	79176	3.33685e+06	1.48152e+07	3.0679e+06	1.03516e+06	2.12053e+06	4.0296e+06	111883	3.36726e+07	1.07422e+07	1.93863e+06	3.95019e+06	1.4034e+06	1.7232e+07	7.23505e+06	6.58655e+06	200878	1.06501e+06	62822	1.77438e+06	91583.4	1.75096e+06	795348	24996.3	215446	891282	132457	1.61057e+07	104296	581707
Sample85	P3D4.d	2023-10-09 04:12:48	S182	MCI	189166	9.7393e+07	291798	94936.3	5.42401e+06	2.89218e+07	6.28785e+06	1.58225e+06	2.53042e+06	1.62989e+07	326386	5.53137e+06	1.57061e+07	9.26161e+06	6.43388e+06	2.71886e+06	2.96409e+07	8.92082e+06	854653	347928	1.25716e+06	67060.6	384038	13191.3	254917	83156	23105.7	377054	1.03503e+06	136517	9.69671e+06	102741	1.61688e+06
Sample86	P3D5.d	2023-10-09 05:25:04	S183	Control	126284	6.61635e+07	177075	45657.5	3.19907e+06	1.39491e+07	3.66903e+06	736136	1.60619e+06	1.61402e+06	113434	1.08625e+07	9.63522e+06	752458	3.14331e+06	1.45962e+06	1.71808e+07	5.69242e+06	1.38415e+06	201225	1.01614e+06	38613.8	1.04756e+06	42904.1	335004	48583.7	18886.5	285636	873964	160948	8.68765e+06	34959.6	216329
Sample87	P3D6.d	2023-10-09 06:37:22	S184	AD	85634.9	7.50511e+07	125282	59327.3	2.41295e+06	1.12221e+07	3.33317e+06	597313	1.39836e+06	3.60802e+06	352770	2.05464e+07	8.38414e+06	2.9452e+06	2.81114e+06	971441	1.69373e+07	5.87231e+06	1.99978e+06	201660	891384	124207	2.83352e+06	224898	2.25452e+06	406515	19430.8	230446	1.09869e+06	733708	2.20886e+07	109304	205576
Sample88	P3D7.d	2023-10-09 07:49:39	S185	AD	135029	7.4009e+07	231771	69991	3.68966e+06	1.93433e+07	1.00995e+07	1.11354e+06	2.29611e+06	1.0134e+07	187035	1.5629e+07	1.16405e+07	6.31713e+06	4.13096e+06	1.93866e+06	4.29505e+07	8.83027e+06	1.16916e+06	257255	1.23282e+06	45304.6	670430	33460.6	391591	114797	19612.9	121860	555710	161618	1.20316e+07	35011.6	554840
Sample89	P3D8.d	2023-10-09 09:01:55	S186	AD	137560	5.58249e+07	205847	41236	3.30645e+06	1.40317e+07	4.65782e+06	845433	2.02807e+06	2.04601e+06	91583	6.23141e+06	1.13633e+07	1.3502e+06	3.73283e+06	1.71797e+06	2.33383e+07	7.60464e+06	1.16859e+06	194079	1.13959e+06	42687.3	735507	27139.4	235546	43633.7	21998.5	64902.8	687099	161701	6.47029e+06	54165.3	228638
Sample90	P3D9.d	2023-10-09 10:14:11	S187	AD	107983	7.49429e+07	189314	72335.1	3.02533e+06	1.63464e+07	6.98278e+06	654261	1.46463e+06	1.74206e+07	204662	1.2311e+07	1.04074e+07	1.53319e+07	3.25139e+06	1.43048e+06	3.08181e+07	6.4351e+06	928782	222583	890204	73576	670309	37473	327332	84375.4	19026	84971.2	1.37387e+06	219954	8.67155e+06	150418	964794
Sample91	P3D10.d	2023-10-09 11:26:29	S188	Control	198866	5.99503e+07	261525	52294	4.85576e+06	2.46128e+07	4.55876e+06	1.29463e+06	2.76056e+06	2.06976e+06	148886	1.22121e+07	1.3161e+07	978375	5.4034e+06	2.29781e+06	2.49418e+07	7.7141e+06	2.46619e+06	170262	1.15022e+06	70156.2	1.37787e+06	32601.2	327590	70719.3	21392.1	109714	801745	301129	8.40652e+06	81975.8	594261
Sample92	P3D11.d	2023-10-09 12:38:45	S189	AD	198324	9.78814e+07	206827	132612	3.48589e+06	2.09979e+07	1.26396e+07	769978	1.87492e+06	4.47887e+06	175712	6.47688e+06	1.06668e+07	2.99921e+06	3.52071e+06	1.84115e+06	4.02035e+07	7.69772e+06	1.26548e+06	194284	891632	37340.9	530785	25087.4	316273	77338.4	16560.7	118938	1.6104e+06	87944	9.58943e+06	96932.4	1.0019e+07
Sample93	P3D12.d	2023-10-09 13:51:02	S190	Control	290193	4.00011e+07	250935	16065.4	4.31783e+06	1.36758e+07	3.92605e+06	1.17464e+06	1.95193e+06	1.12123e+06	11545.2	7.0281e+06	1.15042e+07	511400	4.03106e+06	2.06811e+06	1.586e+07	7.35237e+06	795130	246731	1.18005e+06	12614.4	409495	7392.86	115407	23784.8	18883.1	17412.4	305693	116768	3.03458e+06	0	1.32243e+06
Sample93	QCinst23.d	2023-10-09 19:52:53			80195.9	3.10163e+07	97430.3	27105.1	1.49304e+06	9.59109e+06	963058	533721	889136	2.37356e+06	18757.7	3.67546e+07	6.09634e+06	1.54624e+06	1.79226e+06	945729	8.56004e+06	2.76083e+06	8.84021e+06	94997.2	526470	65143.4	7.00887e+06	370431	2.19434e+06	443776	23940.2	731519	15958	251632	1.39038e+07	0	23406.5
Sample94	P3E1.d	2023-10-09 21:04:40	QC1		86142.2	6.28452e+07	157111	64448.1	2.99463e+06	4.97553e+06	2.66852e+06	637479	1.42077e+06	7.00262e+06	495910	7.24513e+06	8.85045e+06	6.91505e+06	2.79375e+06	1.46533e+06	2.2109e+07	5.87911e+06	837430	192668	816122	360500	1.00337e+06	103338	763005	171268	16505.1	440411	882450	495898	5.28795e+06	135049	556599
Sample96	P3E3.d	2023-10-09 22:16:49	S191	MCI	169660	6.19682e+07	291064	58537.3	4.87174e+06	1.86283e+06	2.28916e+06	1.25158e+06	2.74084e+06	3.80747e+06	263178	2.32854e+06	1.50949e+07	3.39291e+06	6.5522e+06	2.31439e+06	1.98183e+07	9.09079e+06	315550	314931	1.21752e+06	56758.1	308766	19717.1	187739	43741	16854.3	81042.9	954714	168253	2.35184e+06	86436.1	673682
Sample97	P3E4.d	2023-10-09 23:29:06	S192	Control	138898	6.22716e+07	205822	71062.3	3.63298e+06	5.5907e+06	3.76427e+06	904237	1.88254e+06	8.98231e+06	283076	5.91333e+06	1.0608e+07	8.16729e+06	3.37469e+06	1.68572e+06	2.72299e+07	6.63742e+06	342465	220513	1.04017e+06	52755.1	245882	19669.5	198365	45288.7	13891.6	64194.5	2.00651e+06	301048	3.47694e+06	85913.8	2.24774e+06
Sample98	P3E5.d	2023-10-10 00:41:23	S193	MCI	125121	5.60997e+07	200096	55825.9	3.49546e+06	2.1328e+06	2.47554e+06	955817	1.78928e+06	5.31717e+06	287434	9.26889e+06	1.0827e+07	4.52263e+06	4.29015e+06	1.72496e+06	2.04341e+07	8.83112e+06	733030	234442	1.14463e+06	62754.7	858302	73536.2	553553	89623.8	22453.1	138942	1.14717e+06	740043	5.31962e+06	72574	399853
Sample99	P3E6.d	2023-10-10 01:53:41	S194	AD	121889	4.37706e+07	174856	29730.8	3.13178e+06	5.85142e+06	2.64147e+06	839622	1.69879e+06	1.78733e+06	62900	2.03009e+06	9.41702e+06	1.6834e+06	3.62143e+06	1.49633e+06	1.83801e+07	5.56458e+06	489020	208862	1.12862e+06	12949.6	256763	9882.96	119442	35715.3	28696.1	88322.2	488032	203425	6.22486e+06	40857.5	1.05658e+06

## Sheet: ValueList_Helper
Sample
Blank
Cal
QC
CC
DoubleBlank
MatrixSpike
MatrixSpikeDup
MatrixBlank
TuneCheck
ResponseCheck
